# Supplementary material for: Translational control of gene expression by eIF2 modulates proteostasis and extends lifespan
Source: Aging (Albany NY). 2021 Apr 26;13(8):10989–1009. doi: 10.18632/aging.203018 (PMC8109070; doi:10.18632/aging.203018)
Supplement: Supplementary Table 2 [file aging-13-203018-s003.xlsx]

## Sheet: Supplementary Table 2
Supplementary Table 2. Translationally up-regulated genes in eIF2α.S52A.
eIF2α.S52A
Gene.name	ID	logFoldChange	pvalue
ats1	SPAC1002.07c	1.07	0.00903543
sgt1	SPAC1002.10c	0.91	0.0247236
psp3	SPAC1006.01	0.75	0.0423664
kha1	SPAC105.01c	0.89	0.0144199
sir1	SPAC10F6.01c	1.01	0.0205691
ubc6	SPAC10F6.05c	0.95	0.0112546
atg17	SPAC10F6.11c	0.87	0.0222198
SPAC11D3.09	SPAC11D3.09	1.33	0.00481073
SPAC11E3.14	SPAC11E3.14	0.98	0.00960115
sst6	SPAC11H11.01	1.2	0.00666676
mcp60	SPAC12G12.04	0.87	0.0336631
SPAC139.05	SPAC139.05	1.69	0.00035234
SPAC13C5.04	SPAC13C5.04	1.65	0.00034117
SPAC13C5.05c	SPAC13C5.05c	1.01	0.00313939
pof14	SPAC13D6.01	1.05	0.00999346
gld1	SPAC13F5.03c	1.33	0.00716598
hpz2	SPAC13F5.07c	1.22	0.0238685
ssa1	SPAC13G7.02c	1	0.042081
gwt1	SPAC144.10c	1.06	0.00461366
fmc1	SPAC1486.11	1.83	1.99e-06
SPAC14C4.07	SPAC14C4.07	1.17	0.00136487
atm1	SPAC15A10.01	0.94	0.0175516
mug182	SPAC15A10.05c	1.11	0.0130864
mde6	SPAC15A10.10	1.02	0.0309331
SPAC15E1.02c	SPAC15E1.02c	2.13	1.31e-06
mug143	SPAC167.06c	1.89	3.999e-05
SPAC1687.07	SPAC1687.07	1.13	0.01942
SPAC1687.14c	SPAC1687.14c	0.98	0.0319102
SPAC16A10.01	SPAC16A10.01	0.92	0.0356511
gna1	SPAC16E8.03	0.89	0.038442
pap1	SPAC1783.07c	0.88	0.0179806
SPAC1786.02	SPAC1786.02	0.84	0.0325319
slt1	SPAC17G6.13	1.5	0.00180964
pub2	SPAC1805.15c	0.86	0.0213199
SPAC18B11.03c	SPAC18B11.03c	1.29	0.00335213
ncs1	SPAC18B11.04	1.49	2.425e-05
SPAC1952.04c	SPAC1952.04c	1.15	0.00175167
sst4	SPAC19A8.05c	1.33	0.0012231
prl65	SPAC19A8.16	2.19	1.291e-05
atg4	SPAC19B12.08	1.18	0.00701273
pas1	SPAC19E9.03	1.12	0.00318904
SPAC19G12.09	SPAC19G12.09	1.92	1.396e-05
cpy1	SPAC19G12.10c	1.29	0.00023368
tpp1	SPAC19G12.15c	0.84	0.0217578
SPAC1A6.03c	SPAC1A6.03c	1.7	3.7e-07
plb1	SPAC1A6.04c	0.9	0.0202227
wis2	SPAC1B3.03c	1.39	0.00308697
hsp3105	SPAC1F7.06	2.35	1.02e-05
hri1	SPAC20G4.03c	2.61	0
SPAC20G4.05c	SPAC20G4.05c	0.89	0.0208662
itr2	SPAC20G8.03	0.8	0.0161178
rho5	SPAC20H4.11c	0.95	0.0257445
SPAC212.02	SPAC212.02	1.46	0.00639719
SPAC22A12.08c	SPAC22A12.08c	0.78	0.0253847
dak1	SPAC22A12.11	0.97	0.0377767
bip1	SPAC22A12.15c	0.79	0.0230484
SPAC22A12.17c	SPAC22A12.17c	2.08	9.1e-07
gmh3	SPAC22E12.06c	0.75	0.0399165
res2	SPAC22F3.09c	1	0.0168501
pvg5	SPAC22F8.02c	1	0.0453631
SPAC22F8.05	SPAC22F8.05	2.03	3.84e-06
ppk8	SPAC22G7.08	1.23	0.00558426
cum1	SPAC22G7.11c	1.13	0.0318099
SPAC22H10.11c	SPAC22H10.11c	0.98	0.00716436
zym1	SPAC22H10.13	1.54	0.00055578
mug35	SPAC22H12.01c	1.57	0.00046338
fsc1	SPAC22H12.05c	0.85	0.03028
SPAC23A1.14c	SPAC23A1.14c	1.57	0.00064398
SPAC23C11.06c	SPAC23C11.06c	2.34	9.1e-07
hhp2	SPAC23C4.12	1.03	0.0111229
sib2	SPAC23G3.03	1.12	0.00260145
SPAC23H3.15c	SPAC23H3.15c	0.99	0.04856
SPAC24C9.08	SPAC24C9.08	1.01	0.00424269
otu1	SPAC24C9.14	0.92	0.0149876
SPAC25B8.10	SPAC25B8.10	0.73	0.0441356
etr1	SPAC26F1.04c	1.95	5.24e-06
SPAC26F1.07	SPAC26F1.07	1.16	0.011939
SPAC26F1.11	SPAC26F1.11	1.97	0.00013314
aif1	SPAC26F1.14c	1.08	0.0152689
bgl2	SPAC26H5.08c	1.01	0.00367687
SPAC27D7.08c	SPAC27D7.08c	0.82	0.0326202
SPAC27D7.09c	SPAC27D7.09c	1.18	0.0258552
mug108	SPAC29A4.12c	1.49	0.00325114
SPAC29A4.17c	SPAC29A4.17c	1.54	0.00055048
spd1	SPAC29B12.03	0.7	0.040783
pgt1	SPAC29B12.10c	1.41	6.93e-05
tbp1	SPAC29E6.08	0.87	0.0234245
SPAC2E1P3.01	SPAC2E1P3.01	1.95	2.83e-06
imt1	SPAC2F3.01	0.86	0.0194516
SPAC2F3.05c	SPAC2F3.05c	1.65	0.00049663
saf2	SPAC2F3.14c	0.97	0.0151794
atg22	SPAC2G11.13	1	0.00993
SPAC2H10.01	SPAC2H10.01	1.84	1.89e-06
tps1	SPAC328.03	1.48	0.00138406
rds1	SPAC343.12	1.58	0.0001649
mvp1	SPAC3A11.06	0.88	0.0286626
SPAC3A11.10c	SPAC3A11.10c	2.52	0
SPAC3A12.06c	SPAC3A12.06c	0.9	0.0143523
SPAC3A12.08	SPAC3A12.08	1.12	0.00949487
zwf1	SPAC3A12.18	1.29	0.0007461
mug191	SPAC3C7.05c	1.3	0.00193792
SPAC3C7.13c	SPAC3C7.13c	1.88	2.349e-05
obr1	SPAC3C7.14c	1.49	8.7e-06
spd2	SPAC3F10.19	0.75	0.0401004
SPAC3G6.07	SPAC3G6.07	2.22	3.98e-05
isp6	SPAC4A8.04	0.9	0.0304456
SPAC4C5.03	SPAC4C5.03	0.72	0.0407407
pgc1	SPAC4D7.02c	1.11	0.0067087
new13	SPAC4D7.14	0.86	0.0319358
SPAC4F10.17	SPAC4F10.17	2.51	2.43e-06
grx1	SPAC4F10.20	1.55	0.00066909
gos1	SPAC4G8.10	0.94	0.0216678
prz1	SPAC4G8.13c	1.91	4e-08
SPAC4H3.03c	SPAC4H3.03c	2.69	1.2e-07
SPAC4H3.04c	SPAC4H3.04c	1.15	0.00667143
SPAC4H3.08	SPAC4H3.08	3.54	0
pcc1	SPAC4H3.13	0.89	0.0145536
SPAC513.02	SPAC513.02	1.17	0.0233437
dhd1	SPAC513.06c	1.1	0.00844143
pof1	SPAC57A10.05c	1.77	1.565e-05
nhp6	SPAC57A10.09c	0.81	0.0325444
SPAC630.04c	SPAC630.04c	0.87	0.0196355
gyp7	SPAC630.05	1.02	0.00975362
bdf2	SPAC631.02	0.77	0.0363866
SPAC637.03	SPAC637.03	2.98	0
SPAC688.03c	SPAC688.03c	1.33	0.00085593
gst3	SPAC688.04c	1.56	0.00035494
SPAC6B12.04c	SPAC6B12.04c	0.97	0.0208718
nas6	SPAC6C3.08	0.86	0.0431907
rst2	SPAC6F12.02	0.75	0.0377317
fsv1	SPAC6F12.03c	0.77	0.0392598
tvp15	SPAC6F12.04	0.9	0.00987951
cld1	SPAC6G10.03c	0.75	0.0393269
xrc4	SPAC6G9.16c	1.1	0.0053022
vps1	SPAC767.01c	0.7	0.040071
tim14	SPAC824.06	0.77	0.0305476
SPAC869.02c	SPAC869.02c	1.38	0.0003735
SPAC869.05c	SPAC869.05c	4.04	0
SPAC869.06c	SPAC869.06c	1.58	0.00344803
mel1	SPAC869.07c	2.02	0.00015202
pcm2	SPAC869.08	1.11	0.0371135
SPAC869.09	SPAC869.09	2.16	4.575e-05
cgs1	SPAC8C9.03	1	0.0408266
SPAC8C9.04	SPAC8C9.04	0.83	0.0254312
mug63	SPAC8C9.16c	0.85	0.0318037
hsp90	SPAC926.04c	0.93	0.0424904
SPAC977.02	SPAC977.02	1.63	0.00033772
SPAC977.05c	SPAC977.05c	3.86	0
dak2	SPAC977.16c	0.89	0.027897
SPAC977.18	SPAC977.18	4.96	0
SPAC9E9.05	SPAC9E9.05	0.89	0.0486865
plr1	SPAC9E9.11	0.97	0.0235542
SPAC9G1.07	SPAC9G1.07	0.71	0.048548
cmk1	SPACUNK12.02c	1.1	0.00356574
SPACUNK4.16c	SPACUNK4.16c	1.13	0.0176227
SPACUNK4.17	SPACUNK4.17	1.85	0.00012733
hsp9	SPAP8A3.04c	2.84	0
SPAPB1A10.08	SPAPB1A10.08	1.09	0.00528985
alo1	SPAPB1A10.12c	1.01	0.00436326
pof15	SPAPB1A10.14	1.12	0.0155211
SPAPB1A11.02	SPAPB1A11.02	1.72	0.0014441
SPAPB1E7.08c	SPAPB1E7.08c	0.89	0.0162933
mag1	SPAPB24D3.04c	1.1	0.0180795
SPAPB24D3.07c	SPAPB24D3.07c	2.09	7e-08
SPAPB24D3.08c	SPAPB24D3.08c	1.26	0.00097055
agl1	SPAPB24D3.10c	2.52	1.1e-07
pmc1	SPAPB2B4.04c	1.42	6.829e-05
SPAPB2B4.06	SPAPB2B4.06	1.14	0.00480146
SPAPJ691.02	SPAPJ691.02	1.31	0.0105181
mid2	SPAPYUG7.03c	0.76	0.0359021
SPBC106.03	SPBC106.03	1.16	0.00310172
pka1	SPBC106.10	0.94	0.0124356
plg7	SPBC106.11c	0.78	0.040566
cys2	SPBC106.17c	2.4	0
cbp1	SPBC1105.04c	1.41	9.263e-05
SPBC1105.13c	SPBC1105.13c	1.58	0.00131408
rsv2	SPBC1105.14	1.14	0.0137364
tam12	SPBC1105.19	0.86	0.041911
SPBC119.03	SPBC119.03	2.05	6.8e-07
sco1	SPBC119.06	0.72	0.049631
fbp1	SPBC1198.14c	1.95	4.703e-05
SPBC11C11.06c	SPBC11C11.06c	1.84	6.748e-05
SPBC1271.03c	SPBC1271.03c	0.78	0.0323177
SPBC1271.05c	SPBC1271.05c	1.31	0.00108625
SPBC1271.07c	SPBC1271.07c	1.46	6.389e-05
uap2	SPBC1289.02c	1.17	0.0027181
ppr8	SPBC1289.06c	0.98	0.00933002
SPBC1289.14	SPBC1289.14	1.15	0.0292468
cao2	SPBC1289.16c	1.1	0.0154105
cdm1	SPBC12D12.02c	1.24	0.00975862
SPBC14F5.10c	SPBC14F5.10c	0.97	0.00925972
SPBC15C4.06c	SPBC15C4.06c	1.34	0.00068815
egt1	SPBC1604.01	1.45	0.00017432
frp1	SPBC1683.09c	1.4	0.00064071
SPBC1685.05	SPBC1685.05	1.01	0.0125353
SPBC1685.14c	SPBC1685.14c	0.78	0.043467
SPBC16A3.02c	SPBC16A3.02c	1.01	0.0172119
zrt1	SPBC16D10.06	0.87	0.0112432
ubp9	SPBC1703.12	0.95	0.0182589
rid1	SPBC1709.12	0.87	0.0163996
aha1	SPBC1711.08	0.9	0.0412441
SPBC1773.03c	SPBC1773.03c	1.07	0.00912106
tms1	SPBC1773.05c	2.11	8.29e-06
adh8	SPBC1773.06c	2.4	3.9e-07
SPBC1778.03c	SPBC1778.03c	0.75	0.0386463
nep1	SPBC17D1.17	1.16	0.00656374
tam11	SPBC17D11.08	1.75	7.1e-07
SPBC18A7.01	SPBC18A7.01	1.15	0.00361552
SPBC19C7.04c	SPBC19C7.04c	3.64	0
bqt4	SPBC19C7.10	0.87	0.0302312
omh1	SPBC19C7.12c	1.03	0.0118871
puc1	SPBC19F5.01c	0.81	0.0453752
yap18	SPBC19F8.03c	0.81	0.0234918
ubx4	SPBC21C3.11	0.84	0.0286429
SPBC21C3.19	SPBC21C3.19	1.2	0.0203825
mag2	SPBC23G7.11	1.84	0.00053002
SPBC23G7.14	SPBC23G7.14	1.02	0.0223628
SPBC24C6.09c	SPBC24C6.09c	2.52	1.02e-06
pof2	SPBC25B2.11	0.86	0.0252571
gas2	SPBC29A10.08	1.29	0.00038099
ccc2	SPBC29A3.01	0.7	0.0428964
SPBC2A9.02	SPBC2A9.02	0.94	0.0148911
exg3	SPBC2D10.05	1.26	0.00250893
hmt2	SPBC2G5.06c	1.77	3.9e-06
SPBC30D10.14	SPBC30D10.14	1.28	0.00797925
pep12	SPBC31E1.04	0.82	0.0351665
ste11	SPBC32C12.02	0.94	0.0454167
gpx1	SPBC32F12.03c	1.3	0.00179592
SPBC337.02c	SPBC337.02c	0.74	0.0486501
ubi4	SPBC337.08c	1.91	7.6e-07
gpd3	SPBC354.12	2.48	0
cys11	SPBC36.04	1.48	1.166e-05
ish1	SPBC365.12c	1.11	0.0332271
uge1	SPBC365.14c	0.77	0.0229665
pnc1	SPBC365.20c	1.25	0.0008468
SPBC36B7.02	SPBC36B7.02	1.18	0.00191377
fes1	SPBC3B9.01	1.06	0.0151695
slx8	SPBC3D6.11c	0.78	0.0319672
hsp16	SPBC3E7.02c	1.15	0.0212037
SPBC3H7.02	SPBC3H7.02	1.85	2.2e-07
pof9	SPBC3H7.06c	1.06	0.0255712
SPBC3H7.08c	SPBC3H7.08c	1.49	0.00256688
far10	SPBC3H7.13	0.81	0.0239566
SPBC428.10	SPBC428.10	1.23	0.00089657
met17	SPBC428.11	1.99	1.5e-07
SPBC460.05	SPBC460.05	2.75	0
str1	SPBC4F6.09	1.01	0.00900705
SPBC4F6.17c	SPBC4F6.17c	1.64	0.00060153
mug147	SPBC56F2.06	2.53	1.78e-06
uvi15	SPBC649.04	1.47	7.884e-05
prf1	SPBC651.09c	0.73	0.045428
SPBC660.05	SPBC660.05	1.65	0.00110511
SPBC660.06	SPBC660.06	1.93	1.117e-05
ntp1	SPBC660.07	1.56	0.00108328
SPBC713.09	SPBC713.09	0.98	0.0326614
erg1	SPBC713.12	1.03	0.00629959
SPBC725.03	SPBC725.03	0.96	0.0447637
hac1	SPBC725.04	1.35	0.0011907
SPBC725.10	SPBC725.10	2.57	8e-08
SPBC800.14c	SPBC800.14c	0.97	0.00920273
SPBC83.17	SPBC83.17	1.31	0.00214191
cta3	SPBC839.06	1.4	0.00698254
SPBC8D2.12c	SPBC8D2.12c	1.06	0.00564006
SPBP16F5.08c	SPBP16F5.08c	2.79	0
fet4	SPBP26C9.03c	1.51	0.00118967
ecl2	SPBP35G2.16c	1.71	2.039e-05
SPBP35G2.17	SPBP35G2.17	1.17	0.00530035
fub2	SPBP4G3.03	2.42	1.9e-07
SPBP4H10.07	SPBP4H10.07	0.78	0.0456855
rnf10	SPBP8B7.23	0.74	0.0424828
SPBPB10D8.01	SPBPB10D8.01	1.95	1.222e-05
SPBPB10D8.02c	SPBPB10D8.02c	2.81	0
eno102	SPBPB21E7.01c	3.17	0
SPBPB21E7.04c	SPBPB21E7.04c	3.4	0
SPBPB21E7.11	SPBPB21E7.11	1.54	0.00347547
SPBPB2B2.05	SPBPB2B2.05	1.38	0.00256502
SPBPB2B2.07c	SPBPB2B2.07c	1.41	0.00855381
SPBPB2B2.08	SPBPB2B2.08	1.68	0.00143029
gal10	SPBPB2B2.12c	1.94	7.065e-05
SPBPB2B2.15	SPBPB2B2.15	1.71	0.00164146
SPBPB2B2.18	SPBPB2B2.18	5.28	0
mmt1	SPCC1020.03	0.91	0.022383
SPCC1020.05	SPCC1020.05	0.9	0.0109543
oca2	SPCC1020.10	2.05	1e-08
cwf23	SPCC10H11.02	1.38	0.00357013
pmp31	SPCC1183.09c	1.38	8.63e-05
gut2	SPCC1223.03c	2.32	4.4e-07
SPCC1235.01	SPCC1235.01	2.13	9.07e-06
zip2	SPCC126.09	0.87	0.0467867
SPCC1281.04	SPCC1281.04	1.2	0.0224629
gdh2	SPCC132.04c	1.19	0.00121766
srk1	SPCC1322.08	1.04	0.0119401
spt2	SPCC1393.02c	0.98	0.0126445
SPCC1393.12	SPCC1393.12	2.03	5.28e-06
SPCC1442.07c	SPCC1442.07c	1.07	0.0141764
zta1	SPCC1442.16c	1.55	0.00116661
SPCC1450.01c	SPCC1450.01c	1.04	0.0328226
SPCC1739.06c	SPCC1739.06c	2.8	0
ssa2	SPCC1739.13	1.01	0.0352744
wtf21	SPCC1739.15	0.97	0.0313075
adg3	SPCC18.01c	0.9	0.0137518
SPCC18B5.02c	SPCC18B5.02c	0.8	0.0299944
wtf19	SPCC1906.03	0.91	0.0486012
wtf20	SPCC1906.04	1.92	5.033e-05
SPCC191.01	SPCC191.01	2.03	4.82e-06
SPCC191.10	SPCC191.10	1.41	0.00912351
inv1	SPCC191.11	1.55	0.00332359
wtf18	SPCC285.07c	1.2	0.0216291
dsc5	SPCC285.11	1.23	0.00100173
cap1	SPCC306.09c	0.82	0.0257445
SPCC320.06	SPCC320.06	0.79	0.0439303
SPCC330.03c	SPCC330.03c	1.47	0.00030605
SPCC338.06c	SPCC338.06c	1.56	0.00029738
pbi2	SPCC338.12	1.01	0.0234925
SPCC338.18	SPCC338.18	1.67	0.00150334
ser3	SPCC364.07	0.98	0.00441527
cfh2	SPCC417.05c	1.86	9e-08
mug27	SPCC417.06c	1.58	0.0026671
SPCC4G3.03	SPCC4G3.03	1.22	0.017048
coa4	SPCC550.01c	0.75	0.0418092
bqt3	SPCC594.07c	0.81	0.0251926
SPCC622.15c	SPCC622.15c	0.9	0.0406001
eis1	SPCC63.14	1.28	0.00118636
sti1	SPCC645.14c	1.16	0.0146777
pmd1	SPCC663.03	1	0.00469833
osr1	SPCC663.06c	0.94	0.0204089
SPCC663.08c	SPCC663.08c	1.57	0.00013193
SPCC70.02c	SPCC70.02c	0.79	0.030553
SPCC70.03c	SPCC70.03c	0.88	0.0114762
SPCC70.04c	SPCC70.04c	1	0.0484229
SPCC70.10	SPCC70.10	1.3	0.00171716
ecl1	SPCC70.12c	2.14	1.164e-05
wtf7	SPCC736.05	1.03	0.0187374
SPCC736.13	SPCC736.13	1.19	0.00103416
SPCC737.04	SPCC737.04	3.47	0
hmt1	SPCC737.09c	1.01	0.00829662
ssp2	SPCC74.03c	0.73	0.0456916
hsp3101	SPCC757.03c	1.15	0.0240783
ctt1	SPCC757.07c	1.9	1.739e-05
psi1	SPCC830.07c	1.76	0.00027795
osr2	SPCC965.06	2.33	3.5e-07
gst2	SPCC965.07c	1.44	0.00031252
SPCP31B10.02	SPCP31B10.02	0.88	0.0286317
mug190	SPCP31B10.06	1.27	0.00743654
SPCPB16A4.06c	SPCPB16A4.06c	1.57	0.00213895
SPCPB1C11.02	SPCPB1C11.02	2.25	3.28e-06
SPCPB1C11.03	SPCPB1C11.03	1.73	3.835e-05
