# Supplementary material for: Translational control of gene expression by eIF2 modulates proteostasis and extends lifespan
Source: Aging (Albany NY). 2021 Apr 26;13(8):10989–1009. doi: 10.18632/aging.203018 (PMC8109070; doi:10.18632/aging.203018)
Supplement: Supplementary Table 3 [file aging-13-203018-s004.xlsx]

## Sheet: Supplementary Table 3
Supplementary Table 3. % of uORFs of up-regulated genes in wild type and eIF2α.S52A cells.
In Schizosaccharomyces pombe 4693 genes are described. 2975 of them have, at least, 1 AUG in the 5'UTR
0.633923
WT: 388 AUG in 5'UTR (643 total)
WT binomial analysis
376	expected lower value (p<0.01)
439	expected upper value (p<0.01)
S52A mutant: 197 AUG in 5'UTR (347 total)
S52A binomial analysis
197	expected lower value (p<0.01)
243	expected upper value (p<0.01)
