# Supplementary material for: Translational control of gene expression by eIF2 modulates proteostasis and extends lifespan
Source: Aging (Albany NY). 2021 Apr 26;13(8):10989–1009. doi: 10.18632/aging.203018 (PMC8109070; doi:10.18632/aging.203018)
Supplement: Supplementary Table 4 [file aging-13-203018-s005.xlsx]

## Sheet: Supplementary Table 4
Supplementary Table 4. GO biological process analysis of up-regulated genes in wild type cells.
Analysis Type:	PANTHER Overrepresentation Test (Released 20200407)
Annotation Version and Release Date:	GO Ontology database DOI: 10.5281/zenodo.3727280 Released 2020-03-23
Analyzed List:	upload_1 (Schizosaccharomyces pombe)
Reference List:	Schizosaccharomyces pombe (all genes in database)
Test Type:	FISHER
Correction:	FDR
GO biological process complete	Schizosaccharomyces pombe - REFLIST (5112)	upload_1 (635)	upload_1 (expected)	upload_1 (over/under)	upload_1 (fold Enrichment)	upload_1 (raw P-value)	upload_1 (FDR)
disaccharide metabolic process (GO:0005984)	13	9	1.61	+	5.57	0.000305	0.0212
oligosaccharide metabolic process (GO:0009311)	20	11	2.48	+	4.43	0.000291	0.0213
mitochondrion disassembly (GO:0061726)	20	11	2.48	+	4.43	0.000291	0.021
autophagy of mitochondrion (GO:0000422)	20	11	2.48	+	4.43	0.000291	0.0208
autophagy of nucleus (GO:0044804)	19	10	2.36	+	4.24	0.000714	0.0412
macroautophagy (GO:0016236)	38	19	4.72	+	4.03	5.61e-06	0.000584
process utilizing autophagic mechanism (GO:0061919)	51	25	6.34	+	3.95	2.5e-07	3.62e-05
autophagy (GO:0006914)	51	25	6.34	+	3.95	2.5e-07	3.52e-05
autophagosome assembly (GO:0000045)	23	11	2.86	+	3.85	0.000722	0.0413
autophagosome organization (GO:1905037)	23	11	2.86	+	3.85	0.000722	0.0408
organelle disassembly (GO:1903008)	26	12	3.23	+	3.72	0.000535	0.0335
monosaccharide metabolic process (GO:0005996)	42	16	5.22	+	3.07	0.00038	0.0257
cellular response to toxic substance (GO:0097237)	85	31	10.56	+	2.94	2.79e-06	0.000345
cellular detoxification (GO:1990748)	85	31	10.56	+	2.94	2.79e-06	0.000337
detoxification (GO:0098754)	86	31	10.68	+	2.9	3.04e-06	0.000359
response to toxic substance (GO:0009636)	86	31	10.68	+	2.9	3.04e-06	0.000351
vacuole organization (GO:0007033)	50	18	6.21	+	2.9	0.000293	0.0206
carbohydrate catabolic process (GO:0016052)	64	23	7.95	+	2.89	4.48e-05	0.0037
small molecule catabolic process (GO:0044282)	103	31	12.79	+	2.42	6.1e-05	0.00488
carbohydrate metabolic process (GO:0005975)	127	38	15.78	+	2.41	6.92e-06	0.000705
cellular response to chemical stimulus (GO:0070887)	246	60	30.56	+	1.96	5.48e-06	0.000582
catabolic process (GO:0009056)	629	133	78.13	+	1.7	1.25e-08	2.03e-06
response to chemical (GO:0042221)	322	66	40	+	1.65	0.000283	0.021
cellular catabolic process (GO:0044248)	569	115	70.68	+	1.63	1.3e-06	0.000169
organic substance catabolic process (GO:1901575)	570	101	70.8	+	1.43	0.000801	0.0447
cellular response to stimulus (GO:0051716)	741	127	92.05	+	1.38	0.00041	0.0266
response to stimulus (GO:0050896)	790	132	98.13	+	1.35	0.00086	0.0476
metabolic process (GO:0008152)	2819	304	350.17	-	0.87	0.000615	0.0367
cellular process (GO:0009987)	4196	448	521.22	-	0.86	3.54e-11	8.75e-09
cellular metabolic process (GO:0044237)	2722	288	338.12	-	0.85	0.000176	0.0133
organic substance metabolic process (GO:0071704)	2720	273	337.87	-	0.81	1.22e-06	0.000163
primary metabolic process (GO:0044238)	2550	249	316.75	-	0.79	4.12e-07	5.63e-05
protein metabolic process (GO:0019538)	1123	101	139.5	-	0.72	0.000381	0.0254
cellular protein metabolic process (GO:0044267)	1084	94	134.65	-	0.7	0.000112	0.00883
nitrogen compound metabolic process (GO:0006807)	2400	207	298.12	-	0.69	4.56e-12	1.32e-09
cellular component organization (GO:0016043)	1312	111	162.97	-	0.68	4.31e-06	0.000477
organelle organization (GO:0006996)	1005	83	124.84	-	0.66	4.25e-05	0.00356
cellular macromolecule metabolic process (GO:0044260)	1622	129	201.48	-	0.64	1.37e-09	2.54e-07
cellular biosynthetic process (GO:0044249)	1212	91	150.55	-	0.6	3.74e-08	5.72e-06
regulation of macromolecule metabolic process (GO:0060255)	773	58	96.02	-	0.6	2.65e-05	0.00229
regulation of cellular macromolecule biosynthetic process (GO:2000112)	538	40	66.83	-	0.6	0.000581	0.0355
regulation of macromolecule biosynthetic process (GO:0010556)	539	40	66.95	-	0.6	0.000584	0.0353
biosynthetic process (GO:0009058)	1232	91	153.04	-	0.59	1.03e-08	1.73e-06
organic substance biosynthetic process (GO:1901576)	1198	87	148.81	-	0.58	7.29e-09	1.26e-06
cellular component organization or biogenesis (GO:0071840)	1619	117	201.11	-	0.58	1.25e-12	4.05e-10
macromolecule metabolic process (GO:0043170)	2078	150	258.12	-	0.58	1.46e-17	2.53e-14
cell cycle process (GO:0022402)	485	34	60.25	-	0.56	0.0004	0.0263
regulation of gene expression (GO:0010468)	605	41	75.15	-	0.55	2.46e-05	0.00217
heterocycle metabolic process (GO:0046483)	1286	86	159.74	-	0.54	1.03e-11	2.67e-09
organic cyclic compound metabolic process (GO:1901360)	1331	88	165.33	-	0.53	2.1e-12	6.43e-10
cellular aromatic compound metabolic process (GO:0006725)	1272	81	158	-	0.51	8.93e-13	3.09e-10
cellular nitrogen compound metabolic process (GO:0034641)	1623	101	201.61	-	0.5	6.71e-18	1.74e-14
nucleobase-containing compound metabolic process (GO:0006139)	1201	73	149.19	-	0.49	4.07e-13	1.51e-10
cellular component biogenesis (GO:0044085)	911	55	113.16	-	0.49	6.44e-10	1.24e-07
organonitrogen compound biosynthetic process (GO:1901566)	783	47	97.26	-	0.48	1.44e-08	2.26e-06
cellular nitrogen compound biosynthetic process (GO:0044271)	743	42	92.29	-	0.46	4.43e-09	7.94e-07
chromosome organization (GO:0051276)	436	23	54.16	-	0.42	3.89e-06	0.000439
chromatin organization (GO:0006325)	249	13	30.93	-	0.42	0.000571	0.0353
protein-containing complex subunit organization (GO:0043933)	436	22	54.16	-	0.41	1.72e-06	0.000218
nucleic acid metabolic process (GO:0090304)	1016	50	126.21	-	0.4	2e-15	2.08e-12
cellular protein-containing complex assembly (GO:0034622)	346	17	42.98	-	0.4	1.87e-05	0.0017
protein-containing complex assembly (GO:0065003)	352	17	43.72	-	0.39	1e-05	0.000966
mitotic cell cycle process (GO:1903047)	327	15	40.62	-	0.37	1.08e-05	0.00102
mitotic cell cycle (GO:0000278)	333	15	41.36	-	0.36	8.16e-06	0.000801
cellular amide metabolic process (GO:0043603)	468	21	58.13	-	0.36	4.28e-08	6.35e-06
mRNA metabolic process (GO:0016071)	301	13	37.39	-	0.35	1.11e-05	0.00103
macromolecule biosynthetic process (GO:0009059)	760	30	94.41	-	0.32	9.06e-15	5.23e-12
cellular macromolecule biosynthetic process (GO:0034645)	756	29	93.91	-	0.31	4.5e-15	2.93e-12
RNA metabolic process (GO:0016070)	747	28	92.79	-	0.3	3.13e-15	2.32e-12
nuclear chromosome segregation (GO:0098813)	150	5	18.63	-	0.27	0.000618	0.0365
gene expression (GO:0010467)	1091	36	135.52	-	0.27	9.57e-26	4.98e-22
chromosome segregation (GO:0007059)	152	5	18.88	-	0.26	0.000435	0.0279
amide biosynthetic process (GO:0043604)	412	12	51.18	-	0.23	1.66e-10	3.76e-08
RNA processing (GO:0006396)	509	14	63.23	-	0.22	2.58e-13	1.12e-10
peptide metabolic process (GO:0006518)	388	10	48.2	-	0.21	8.25e-11	1.95e-08
mitochondrial gene expression (GO:0140053)	149	3	18.51	-	0.16	3.48e-05	0.00297
ribonucleoprotein complex subunit organization (GO:0071826)	154	3	19.13	-	0.16	2.43e-05	0.00218
peptide biosynthetic process (GO:0043043)	366	7	45.46	-	0.15	8.43e-12	2.31e-09
RNA modification (GO:0009451)	107	2	13.29	-	0.15	0.000533	0.0338
tRNA processing (GO:0008033)	111	2	13.79	-	0.15	0.000367	0.0251
tRNA metabolic process (GO:0006399)	167	3	20.74	-	0.14	5.21e-06	0.000564
mitochondrial translation (GO:0032543)	119	2	14.78	-	0.14	0.000175	0.0134
ribonucleoprotein complex assembly (GO:0022618)	149	2	18.51	-	0.11	8.05e-06	0.000805
ribonucleoprotein complex biogenesis (GO:0022613)	435	5	54.03	-	0.09	4.53e-17	5.89e-14
translation (GO:0006412)	357	4	44.35	-	0.09	5.37e-14	2.54e-11
ncRNA metabolic process (GO:0034660)	368	4	45.71	-	0.09	1.51e-14	7.85e-12
ribosomal small subunit biogenesis (GO:0042274)	102	1	12.67	-	0.08	0.000171	0.0133
ncRNA processing (GO:0034470)	320	3	39.75	-	0.08	3.45e-13	1.38e-10
cytoplasmic translation (GO:0002181)	234	2	29.07	-	0.07	4.52e-10	9.39e-08
ribosome biogenesis (GO:0042254)	358	3	44.47	-	0.07	3.07e-15	2.66e-12
rRNA processing (GO:0006364)	213	1	26.46	-	0.04	4.61e-10	9.21e-08
rRNA metabolic process (GO:0016072)	219	1	27.2	-	0.04	1.91e-10	4.14e-08
RNA phosphodiester bond hydrolysis (GO:0090501)	68	0	8.45	-	< 0,01	0.000625	0.0365
ribosomal large subunit biogenesis (GO:0042273)	88	0	10.93	-	< 0,01	4.83e-05	0.00392
