# Supplementary material for: Translational control of gene expression by eIF2 modulates proteostasis and extends lifespan
Source: Aging (Albany NY). 2021 Apr 26;13(8):10989–1009. doi: 10.18632/aging.203018 (PMC8109070; doi:10.18632/aging.203018)
Supplement: Supplementary Table 5 [file aging-13-203018-s006.xlsx]

## Sheet: Supplementary Table 5
Supplementary Table 5. GO biological process analysis of up-regulated genes in eIF2α.S52A cells.
Analysis Type:	PANTHER Overrepresentation Test (Released 20200407)
Annotation Version and Release Date:	GO Ontology database DOI: 10.5281/zenodo.3727280 Released 2020-03-23
Analyzed List:	upload_1 (Schizosaccharomyces pombe)
Reference List:	Schizosaccharomyces pombe (all genes in database)
Test Type:	FISHER
Correction:	FDR
GO biological process complete	Schizosaccharomyces pombe - REFLIST (5112)	upload_1 (339)	upload_1 (expected)	upload_1 (over/under)	upload_1 (fold Enrichment)	upload_1 (raw P-value)	upload_1 (FDR)
alditol catabolic process (GO:0019405)	6	5	0.4	+	12.57	0.000305	0.0227
oligosaccharide biosynthetic process (GO:0009312)	7	5	0.46	+	10.77	0.000497	0.0331
trehalose metabolic process (GO:0005991)	7	5	0.46	+	10.77	0.000497	0.0327
disaccharide biosynthetic process (GO:0046351)	7	5	0.46	+	10.77	0.000497	0.0323
disaccharide metabolic process (GO:0005984)	13	9	0.86	+	10.44	3.02e-06	0.000449
alditol metabolic process (GO:0019400)	8	5	0.53	+	9.42	0.000767	0.0469
oligosaccharide metabolic process (GO:0009311)	20	10	1.33	+	7.54	7.43e-06	0.000965
cellular carbohydrate catabolic process (GO:0044275)	27	10	1.79	+	5.59	5.82e-05	0.0054
chaperone-mediated protein folding (GO:0061077)	22	8	1.46	+	5.48	0.00036	0.0263
carbohydrate catabolic process (GO:0016052)	64	19	4.24	+	4.48	4.76e-07	9.17e-05
cellular carbohydrate metabolic process (GO:0044262)	82	20	5.44	+	3.68	3.23e-06	0.000467
carbohydrate metabolic process (GO:0005975)	127	30	8.42	+	3.56	1.94e-08	5.04e-06
detoxification (GO:0098754)	86	19	5.7	+	3.33	1.93e-05	0.00233
response to toxic substance (GO:0009636)	86	19	5.7	+	3.33	1.93e-05	0.00228
cellular response to toxic substance (GO:0097237)	85	18	5.64	+	3.19	5.19e-05	0.005
cellular detoxification (GO:1990748)	85	18	5.64	+	3.19	5.19e-05	0.0049
cellular response to chemical stress (GO:0062197)	69	14	4.58	+	3.06	0.000515	0.0331
small molecule catabolic process (GO:0044282)	103	18	6.83	+	2.64	0.00043	0.0298
cellular response to chemical stimulus (GO:0070887)	246	38	16.31	+	2.33	5.69e-06	0.0008
response to chemical (GO:0042221)	322	42	21.35	+	1.97	6.76e-05	0.00617
catabolic process (GO:0009056)	629	67	41.71	+	1.61	0.000196	0.0157
cellular process (GO:0009987)	4196	231	278.26	-	0.83	2.51e-09	8.15e-07
metabolic process (GO:0008152)	2819	144	186.94	-	0.77	6.26e-06	0.000835
cellular metabolic process (GO:0044237)	2722	133	180.51	-	0.74	6.82e-07	0.000127
organic substance metabolic process (GO:0071704)	2720	132	180.38	-	0.73	3.82e-07	7.63e-05
primary metabolic process (GO:0044238)	2550	119	169.1	-	0.7	1.17e-07	2.77e-05
regulation of cellular process (GO:0050794)	1163	50	77.12	-	0.65	0.000437	0.0299
regulation of biological process (GO:0050789)	1267	52	84.02	-	0.62	4.65e-05	0.00465
cellular protein metabolic process (GO:0044267)	1084	44	71.88	-	0.61	0.000177	0.0144
protein metabolic process (GO:0019538)	1123	45	74.47	-	0.6	9.19e-05	0.0081
nitrogen compound metabolic process (GO:0006807)	2400	92	159.15	-	0.58	5.05e-13	4.37e-10
cellular biosynthetic process (GO:0044249)	1212	44	80.37	-	0.55	1.97e-06	0.000301
organic substance biosynthetic process (GO:1901576)	1198	43	79.44	-	0.54	1.76e-06	0.000277
biosynthetic process (GO:0009058)	1232	44	81.7	-	0.54	8.34e-07	0.000144
cellular macromolecule metabolic process (GO:0044260)	1622	57	107.56	-	0.53	1.91e-09	6.61e-07
cellular localization (GO:0051641)	787	26	52.19	-	0.5	3.93e-05	0.00408
cellular component organization (GO:0016043)	1312	43	87	-	0.49	1.79e-08	4.89e-06
organonitrogen compound biosynthetic process (GO:1901566)	783	25	51.92	-	0.48	2.51e-05	0.00272
cellular protein localization (GO:0034613)	598	19	39.66	-	0.48	0.000267	0.0207
macromolecule metabolic process (GO:0043170)	2078	66	137.8	-	0.48	9.06e-16	2.35e-12
protein localization (GO:0008104)	604	19	40.05	-	0.47	0.000271	0.0207
cellular macromolecule localization (GO:0070727)	606	19	40.19	-	0.47	0.000201	0.0159
cellular component assembly (GO:0022607)	578	18	38.33	-	0.47	0.000296	0.0223
macromolecule localization (GO:0033036)	648	20	42.97	-	0.47	0.000105	0.00879
organelle organization (GO:0006996)	1005	31	66.65	-	0.47	3.19e-07	6.63e-05
cellular component organization or biogenesis (GO:0071840)	1619	49	107.36	-	0.46	2.13e-12	1.39e-09
cellular component biogenesis (GO:0044085)	911	27	60.41	-	0.45	7.41e-07	0.000133
establishment of localization in cell (GO:0051649)	583	17	38.66	-	0.44	0.000103	0.00881
heterocycle metabolic process (GO:0046483)	1286	36	85.28	-	0.42	8.67e-11	4.1e-08
organic cyclic compound metabolic process (GO:1901360)	1331	37	88.26	-	0.42	2.43e-11	1.4e-08
cellular nitrogen compound biosynthetic process (GO:0044271)	743	20	49.27	-	0.41	1.5e-06	0.000244
cellular aromatic compound metabolic process (GO:0006725)	1272	34	84.35	-	0.4	2.77e-11	1.44e-08
cellular nitrogen compound metabolic process (GO:0034641)	1623	43	107.63	-	0.4	2.59e-15	4.48e-12
intracellular transport (GO:0046907)	508	13	33.69	-	0.39	7.73e-05	0.00693
cellular protein-containing complex assembly (GO:0034622)	346	8	22.94	-	0.35	0.000568	0.0356
protein-containing complex assembly (GO:0065003)	352	8	23.34	-	0.34	0.000413	0.0294
nucleobase-containing compound metabolic process (GO:0006139)	1201	27	79.64	-	0.34	3.12e-13	3.25e-10
mitotic cell cycle process (GO:1903047)	327	7	21.68	-	0.32	0.000411	0.0296
mitotic cell cycle (GO:0000278)	333	7	22.08	-	0.32	0.000423	0.0297
protein-containing complex subunit organization (GO:0043933)	436	9	28.91	-	0.31	2.22e-05	0.00246
regulation of organelle organization (GO:0033043)	301	6	19.96	-	0.3	0.00056	0.0355
cellular amide metabolic process (GO:0043603)	468	9	31.04	-	0.29	5.84e-06	0.000799
macromolecule biosynthetic process (GO:0009059)	760	14	50.4	-	0.28	8.74e-10	3.25e-07
chromosome organization (GO:0051276)	436	8	28.91	-	0.28	7.7e-06	0.000976
regulation of cellular component organization (GO:0051128)	329	6	21.82	-	0.28	0.000149	0.0123
peptide metabolic process (GO:0006518)	388	7	25.73	-	0.27	2.01e-05	0.00232
cellular macromolecule biosynthetic process (GO:0034645)	756	13	50.13	-	0.26	2.65e-10	1.06e-07
peptide biosynthetic process (GO:0043043)	366	6	24.27	-	0.25	1.82e-05	0.00225
chromatin organization (GO:0006325)	249	4	16.51	-	0.24	0.0007	0.0433
nucleic acid metabolic process (GO:0090304)	1016	16	67.38	-	0.24	5.04e-15	6.54e-12
gene expression (GO:0010467)	1091	16	72.35	-	0.22	6.33e-17	3.29e-13
amide biosynthetic process (GO:0043604)	412	6	27.32	-	0.22	1.46e-06	0.000245
mRNA metabolic process (GO:0016071)	301	4	19.96	-	0.2	4.04e-05	0.00412
RNA metabolic process (GO:0016070)	747	9	49.54	-	0.18	8.67e-13	6.44e-10
RNA processing (GO:0006396)	509	6	33.75	-	0.18	7.3e-09	2.23e-06
cytoplasmic translation (GO:0002181)	234	2	15.52	-	0.13	4.69e-05	0.0046
translation (GO:0006412)	357	3	23.67	-	0.13	2.07e-07	4.67e-05
ncRNA processing (GO:0034470)	320	2	21.22	-	0.09	2.88e-07	6.23e-05
tRNA metabolic process (GO:0006399)	167	1	11.07	-	0.09	0.00047	0.0317
ribosome biogenesis (GO:0042254)	358	2	23.74	-	0.08	2.5e-08	6.2e-06
ncRNA metabolic process (GO:0034660)	368	2	24.4	-	0.08	1.76e-08	5.08e-06
rRNA processing (GO:0006364)	213	1	14.12	-	0.07	3.09e-05	0.00328
ribonucleoprotein complex biogenesis (GO:0022613)	435	2	28.85	-	0.07	1.68e-10	7.26e-08
rRNA metabolic process (GO:0016072)	219	1	14.52	-	0.07	2.05e-05	0.00232
mitochondrial translation (GO:0032543)	119	0	7.89	-	< 0,01	0.000789	0.0477
ribonucleoprotein complex assembly (GO:0022618)	149	0	9.88	-	< 0,01	9.96e-05	0.00863
