# Supplementary material for: Translational control of gene expression by eIF2 modulates proteostasis and extends lifespan
Source: Aging (Albany NY). 2021 Apr 26;13(8):10989–1009. doi: 10.18632/aging.203018 (PMC8109070; doi:10.18632/aging.203018)
Supplement: Supplementary Table 6 [file aging-13-203018-s007.xlsx]

## Sheet: Supplementary Table 6
Supplementary Table 6. Comparison of Supplementary Tables 4, 5.
	WT		eIF2α.S52A
GO biological process complete	over/under	raw P-value	over/under2	raw P-value3
alditol catabolic process (GO:0019405)			+	0.000305
alditol metabolic process (GO:0019400)			+	0.000767
amide biosynthetic process (GO:0043604)	-	1.66e-10	-	1.46e-06
autophagosome assembly (GO:0000045)	+	0.000722
autophagosome organization (GO:1905037)	+	0.000722
autophagy (GO:0006914)	+	2.5e-07	-	8.34e-07
autophagy of mitochondrion (GO:0000422)	+	0.000291	+	4.76e-07
autophagy of nucleus (GO:0044804)	+	0.000714	+	1.94e-08
biosynthetic process (GO:0009058)	-	1.03e-08	+	0.000196
carbohydrate catabolic process (GO:0016052)	+	4.48e-05	-	5.84e-06
carbohydrate metabolic process (GO:0005975)	+	6.92e-06	-	2.77e-11
catabolic process (GO:0009056)	+	1.25e-08	-	1.97e-06
cell cycle process (GO:0022402)	-	0.0004
cellular amide metabolic process (GO:0043603)	-	4.28e-08	+	5.82e-05
cellular aromatic compound metabolic process (GO:0006725)	-	8.93e-13	+	3.23e-06
cellular biosynthetic process (GO:0044249)	-	3.74e-08	-	0.000296
cellular carbohydrate catabolic process (GO:0044275)			-	7.41e-07
cellular carbohydrate metabolic process (GO:0044262)			-	1.79e-08
cellular catabolic process (GO:0044248)	+	1.3e-06
cellular component assembly (GO:0022607)			-	2.13e-12
cellular component biogenesis (GO:0044085)	-	6.44e-10	+	5.19e-05
cellular component organization (GO:0016043)	-	4.31e-06	-	3.93e-05
cellular component organization or biogenesis (GO:0071840)	-	1.25e-12	-	2.65e-10
cellular detoxification (GO:1990748)	+	2.79e-06	-	0.000201
cellular localization (GO:0051641)			-	1.91e-09
cellular macromolecule biosynthetic process (GO:0034645)	-	4.5e-15	-	6.82e-07
cellular macromolecule localization (GO:0070727)			-	1.5e-06
cellular macromolecule metabolic process (GO:0044260)	-	1.37e-09	-	2.59e-15
cellular metabolic process (GO:0044237)	-	0.000176	-	2.51e-09
cellular nitrogen compound biosynthetic process (GO:0044271)	-	4.43e-09	-	0.000267
cellular nitrogen compound metabolic process (GO:0034641)	-	6.71e-18	-	0.000177
cellular process (GO:0009987)	-	3.54e-11	-	0.000568
cellular protein localization (GO:0034613)			+	5.69e-06
cellular protein metabolic process (GO:0044267)	-	0.000112	+	0.000515
cellular protein-containing complex assembly (GO:0034622)	-	1.87e-05	+	5.19e-05
cellular response to chemical stimulus (GO:0070887)	+	5.48e-06	+	0.00036
cellular response to chemical stress (GO:0062197)			-	0.0007
cellular response to stimulus (GO:0051716)	+	0.00041
cellular response to toxic substance (GO:0097237)	+	2.79e-06	-	7.7e-06
chaperone-mediated protein folding (GO:0061077)			-	4.69e-05
chromatin organization (GO:0006325)	-	0.000571	+	1.93e-05
chromosome organization (GO:0051276)	-	3.89e-06	+	0.000497
chromosome segregation (GO:0007059)	-	0.000435
cytoplasmic translation (GO:0002181)	-	4.52e-10	+	3.02e-06
detoxification (GO:0098754)	+	3.04e-06	-	0.000103
disaccharide biosynthetic process (GO:0046351)			-	6.33e-17
disaccharide metabolic process (GO:0005984)	+	0.000305	-	8.67e-11
establishment of localization in cell (GO:0051649)			-	7.73e-05
gene expression (GO:0010467)	-	9.57e-26	-	8.74e-10
heterocycle metabolic process (GO:0046483)	-	1.03e-11	-	0.000105
intracellular transport (GO:0046907)			-	9.06e-16
macroautophagy (GO:0016236)	+	5.61e-06
macromolecule biosynthetic process (GO:0009059)	-	9.06e-15	-	6.26e-06
macromolecule localization (GO:0033036)			-	0.000789
macromolecule metabolic process (GO:0043170)	-	1.46e-17	-	0.000423
metabolic process (GO:0008152)	-	0.000615	-	0.000411
mitochondrial gene expression (GO:0140053)	-	3.48e-05
mitochondrial translation (GO:0032543)	-	0.000175	-	4.04e-05
mitochondrion disassembly (GO:0061726)	+	0.000291
mitotic cell cycle (GO:0000278)	-	8.16e-06	-	1.76e-08
mitotic cell cycle process (GO:1903047)	-	1.08e-05	-	2.88e-07
monosaccharide metabolic process (GO:0005996)	+	0.00038
mRNA metabolic process (GO:0016071)	-	1.11e-05	-	5.05e-13
ncRNA metabolic process (GO:0034660)	-	1.51e-14	-	5.04e-15
ncRNA processing (GO:0034470)	-	3.45e-13	-	3.12e-13
nitrogen compound metabolic process (GO:0006807)	-	4.56e-12	+	0.000497
nuclear chromosome segregation (GO:0098813)	-	0.000618
nucleic acid metabolic process (GO:0090304)	-	2e-15	+	7.43e-06
nucleobase-containing compound metabolic process (GO:0006139)	-	4.07e-13	-	3.19e-07
oligosaccharide biosynthetic process (GO:0009312)			-	2.43e-11
oligosaccharide metabolic process (GO:0009311)	+	0.000291	-	1.76e-06
organelle disassembly (GO:1903008)	+	0.000535
organelle organization (GO:0006996)	-	4.25e-05	-	3.82e-07
organic cyclic compound metabolic process (GO:1901360)	-	2.1e-12	-	2.51e-05
organic substance biosynthetic process (GO:1901576)	-	7.29e-09	-	1.82e-05
organic substance catabolic process (GO:1901575)	+	0.000801
organic substance metabolic process (GO:0071704)	-	1.22e-06	-	2.01e-05
organonitrogen compound biosynthetic process (GO:1901566)	-	1.44e-08	-	1.17e-07
peptide biosynthetic process (GO:0043043)	-	8.43e-12	-	0.000271
peptide metabolic process (GO:0006518)	-	8.25e-11	-	9.19e-05
primary metabolic process (GO:0044238)	-	4.12e-07	-	0.000413
process utilizing autophagic mechanism (GO:0061919)	+	2.5e-07
protein localization (GO:0008104)			-	2.22e-05
protein metabolic process (GO:0019538)	-	0.000381	-	4.65e-05
protein-containing complex assembly (GO:0065003)	-	1e-05	-	0.000149
protein-containing complex subunit organization (GO:0043933)	-	1.72e-06	-	0.000437
regulation of biological process (GO:0050789)			-	0.00056
regulation of cellular component organization (GO:0051128)			+	6.76e-05
regulation of cellular macromolecule biosynthetic process (GO:2000112)	-	0.000581
regulation of cellular process (GO:0050794)			+	1.93e-05
regulation of gene expression (GO:0010468)	-	2.46e-05
regulation of macromolecule biosynthetic process (GO:0010556)	-	0.000584
regulation of macromolecule metabolic process (GO:0060255)	-	2.65e-05
regulation of organelle organization (GO:0033043)			-	9.96e-05
response to chemical (GO:0042221)	+	0.000283	-	1.68e-10
response to stimulus (GO:0050896)	+	0.00086
response to toxic substance (GO:0009636)	+	3.04e-06	-	2.5e-08
ribonucleoprotein complex assembly (GO:0022618)	-	8.05e-06	-	8.67e-13
ribonucleoprotein complex biogenesis (GO:0022613)	-	4.53e-17	-	7.3e-09
ribonucleoprotein complex subunit organization (GO:0071826)	-	2.43e-05
ribosomal large subunit biogenesis (GO:0042273)	-	4.83e-05
ribosomal small subunit biogenesis (GO:0042274)	-	0.000171
ribosome biogenesis (GO:0042254)	-	3.07e-15	-	2.05e-05
RNA metabolic process (GO:0016070)	-	3.13e-15	-	3.09e-05
RNA modification (GO:0009451)	-	0.000533
RNA phosphodiester bond hydrolysis (GO:0090501)	-	0.000625
RNA processing (GO:0006396)	-	2.58e-13	+	0.00043
rRNA metabolic process (GO:0016072)	-	1.91e-10	-	2.07e-07
rRNA processing (GO:0006364)	-	4.61e-10	+	0.000497
small molecule catabolic process (GO:0044282)	+	6.1e-05	-	0.00047
translation (GO:0006412)	-	5.37e-14	-	2.07e-07
tRNA metabolic process (GO:0006399)	-	5.21e-06	+	0.000497
tRNA metabolic process (GO:0006399)			-	0.00047
tRNA processing (GO:0008033)	-	0.000367
vacuole organization (GO:0007033)	+	0.000293
