# Supplementary material for: Translational control of gene expression by eIF2 modulates proteostasis and extends lifespan
Source: Aging (Albany NY). 2021 Apr 26;13(8):10989–1009. doi: 10.18632/aging.203018 (PMC8109070; doi:10.18632/aging.203018)
Supplement: Supplementary Table 7 [file aging-13-203018-s008.xlsx]

## Sheet: Supplementary Table 7
Supplementary Table 7. Translationally up-regulated genes exclusive of wild type cells.
upregulated genes exclusive of WT
Gene.name	ID	logFoldChange	pvalue
jmj2	SPAC1002.05c	0.85	0.0110682
dld1	SPAC1002.09c	1.02	0.00014045
SPAC1002.12c	SPAC1002.12c	1.23	7.77e-06
SPAC1039.06	SPAC1039.06	0.79	0.0114164
SPAC10F6.04	SPAC10F6.04	0.76	0.0123283
vip1	SPAC10F6.06	1.36	1e-06
SPAC10F6.13c	SPAC10F6.13c	0.76	0.00323425
SPAC10F6.17c	SPAC10F6.17c	0.82	0.00378658
ctr5	SPAC1142.05	0.93	0.00026447
hsp3104	SPAC11D3.13	0.95	0.0262879
SPAC11D3.18c	SPAC11D3.18c	0.93	0.0131833
SPAC11D3.19	SPAC11D3.19	1.84	0.00013456
map1	SPAC11E3.06	0.88	0.0323344
idh1	SPAC11G7.03	0.9	0.00052327
ubc14	SPAC1250.03	0.72	0.0469134
SPAC12B10.01c	SPAC12B10.01c	1.07	0.00046226
mug157	SPAC12B10.16c	0.7	0.00855939
mug121	SPAC13C5.06c	1.22	0.00010339
are1	SPAC13G7.05	0.74	0.045511
ctr1	SPAC140.04	0.92	0.0208182
SPAC144.17c	SPAC144.17c	0.87	0.00220232
SPAC1486.01	SPAC1486.01	0.91	0.00056657
SPAC14C4.01c	SPAC14C4.01c	1.14	2.258e-05
SPAC14C4.10c	SPAC14C4.10c	1.02	0.00990999
rcf2	SPAC1565.01	0.73	0.0139857
ste4	SPAC1565.04c	1	0.00029424
rad54	SPAC15A10.03c	0.84	0.0145251
hal3	SPAC15E1.04	0.89	0.00099561
fub1	SPAC15E1.10	1.45	5.43e-06
SPAC15F9.01c	SPAC15F9.01c	1.04	0.0328676
mug99	SPAC1610.04	0.91	0.00295564
SPAC1635.01	SPAC1635.01	1.22	9.3e-07
SPAC167.05	SPAC167.05	0.97	0.0016266
tax4	SPAC1687.09	0.82	0.0058809
puf3	SPAC1687.22c	0.78	0.0233921
SPAC16C9.01c	SPAC16C9.01c	1.11	0.00014037
scd1	SPAC16E8.09	0.75	0.0080687
SPAC1705.02	SPAC1705.02	0.94	0.00357069
gti1	SPAC1751.01c	1.11	0.007352
ypa2	SPAC1782.05	0.76	0.00863421
phb1	SPAC1782.06c	0.82	0.0043811
SPAC1782.12c	SPAC1782.12c	1.36	4.37e-06
SPAC1783.01	SPAC1783.01	0.83	0.00579373
rec12	SPAC17A5.11	1.17	0.00575517
sam50	SPAC17C9.06	0.89	0.00113344
SPAC17C9.11c	SPAC17C9.11c	1.19	0.00052033
scs22	SPAC17C9.12	1.21	1.341e-05
pex7	SPAC17D4.01	0.91	0.00166126
SPAC17G6.03	SPAC17G6.03	0.86	0.00705663
dma1	SPAC17G8.10c	0.92	0.00327899
cdt2	SPAC17H9.19c	0.87	0.00851548
SPAC1805.10	SPAC1805.10	0.76	0.0196586
mug51	SPAC1834.09	0.79	0.0213396
sec18	SPAC1834.11c	0.88	0.00275696
SPAC186.02c	SPAC186.02c	1.51	0.0120409
SPAC186.04c	SPAC186.04c	1.49	0.0109116
rhp6	SPAC18B11.07c	0.76	0.00679551
SPAC18G6.01c	SPAC18G6.01c	0.9	0.00697323
ned1	SPAC1952.13	1.19	0.00014443
sst2	SPAC19B12.10	0.76	0.0307115
uga1	SPAC19D5.07	1.29	9.617e-05
pms1	SPAC19G12.02c	0.81	0.00869868
cda1	SPAC19G12.03	1.04	0.00075343
meu31	SPAC1A6.06c	1.11	0.0319469
SPAC1B3.06c	SPAC1B3.06c	0.82	0.00934935
SPAC1B3.08	SPAC1B3.08	0.77	0.0047052
ypt4	SPAC1B3.11c	0.73	0.0168886
SPAC1B3.20	SPAC1B3.20	1.16	0.00040129
aut12	SPAC1D4.03c	0.88	0.00696824
byr1	SPAC1D4.13	0.88	0.0181353
mkh1	SPAC1F3.02c	0.9	0.00287996
sro7	SPAC1F3.03	0.7	0.0370232
shk2	SPAC1F5.09c	1.97	6.3e-07
SPAC1F7.09c	SPAC1F7.09c	0.91	0.00106832
yak3	SPAC1F7.12	1.14	0.00016398
SPAC1F8.04c	SPAC1F8.04c	3.02	0
atg6	SPAC20G8.10c	0.82	0.0111485
pcr1	SPAC21E11.03c	0.92	0.00783454
aca1	SPAC21E11.04	1.3	0.00014378
meu13	SPAC222.15	1.03	0.035677
SPAC222.17	SPAC222.17	1.17	0.00027584
SPAC222.18	SPAC222.18	0.86	0.00326262
atg10	SPAC227.04	0.73	0.0162865
reg1	SPAC227.15	0.88	0.0126685
sdj1	SPAC22E12.03c	1.28	6.89e-06
gdi1	SPAC22H10.12c	0.99	0.00012399
SPAC23C4.05c	SPAC23C4.05c	0.8	0.00202186
atg15	SPAC23C4.16c	1.07	7.407e-05
ayr1	SPAC23D3.11	1.05	0.00053025
SPAC23D3.17	SPAC23D3.17	1.15	0.00026465
SPAC23H3.04	SPAC23H3.04	1.03	0.01523
SPAC24B11.05	SPAC24B11.05	1.01	0.00089377
aco1	SPAC24C9.06c	0.93	0.00026071
SPAC24H6.08	SPAC24H6.08	0.77	0.0254425
atg14	SPAC25A8.02	1.33	3.092e-05
psd2	SPAC25B8.03	0.76	0.0169605
SPAC25B8.09	SPAC25B8.09	1.26	0.0004412
SPAC25B8.18	SPAC25B8.18	0.92	0.0108795
jmj1	SPAC25H1.02	0.94	0.0129533
atg101	SPAC25H1.03	0.96	0.0448009
sxa1	SPAC26A3.01	0.77	0.0052116
gid5	SPAC26H5.04	0.82	0.007085
SPAC26H5.09c	SPAC26H5.09c	1.1	0.0056549
mei2	SPAC27D7.03c	2.44	0
msm1	SPAC27E2.06c	0.79	0.00713076
pof11	SPAC29E6.01	0.79	0.00492785
mxr1	SPAC29E6.05c	0.71	0.0359709
msy2	SPAC2C4.17c	0.86	0.0109301
SPAC2E1P3.05c	SPAC2E1P3.05c	1	0.00418503
sut1	SPAC2F3.08	0.89	0.00752946
pol4	SPAC2F7.06c	1.55	0.014526
sft1	SPAC31A2.13c	0.77	0.00621708
spk1	SPAC31G5.09c	1.77	1.2e-07
sde2	SPAC31G5.18c	0.79	0.00684045
SPAC31G5.21	SPAC31G5.21	1.29	7.79e-06
SPAC323.04	SPAC323.04	0.72	0.0105559
SPAC32A11.02c	SPAC32A11.02c	1.7	2e-08
SPAC343.06c	SPAC343.06c	0.77	0.00920061
cnx1	SPAC3C7.11c	0.76	0.00886681
pdc201	SPAC3G9.11c	2.28	0
nab3	SPAC3H8.09c	0.81	0.0277695
dli1	SPAC458.04c	1.99	7.98e-06
pik3	SPAC458.05	0.84	0.00504695
aap1	SPAC4F10.02	0.84	0.00212701
atg13	SPAC4F10.07c	1.16	0.00029836
cmc4	SPAC4F10.22	1.67	7.89e-06
did4	SPAC4F8.01	1.05	0.00013404
SPAC4G8.04	SPAC4G8.04	1.09	0.0002255
mug133	SPAC4G9.07	1.26	0.0176829
cmb1	SPAC4G9.11c	1.13	5.5e-05
SPAC4G9.19	SPAC4G9.19	0.72	0.0453365
SPAC4G9.22	SPAC4G9.22	0.76	0.0186795
SPAC4H3.17	SPAC4H3.17	1.52	0.0174897
ams1	SPAC513.05	0.94	0.00452672
mug15	SPAC57A10.06	1.97	7.317e-05
SPAC57A7.05	SPAC57A7.05	1.35	0.00020499
pzh1	SPAC57A7.08	1.32	5.2e-07
dam1	SPAC589.08c	1.05	0.00086933
pxa1	SPAC5D6.07c	1.11	0.0007986
hsp3102	SPAC5H10.02c	1.41	0.00503703
SPAC5H10.10	SPAC5H10.10	1.12	0.00012091
gmh1	SPAC5H10.11	1.73	0.00024315
SPAC607.08c	SPAC607.08c	1.27	0.00493449
mug177	SPAC630.15	1.44	0.00031443
slm1	SPAC637.13c	0.87	0.00183755
bit2	SPAC6B12.03c	2.59	1.5e-07
mug185	SPAC6B12.08	1.84	3.39e-06
SPAC6B12.13	SPAC6B12.13	1.17	6.349e-05
cit1	SPAC6C3.04	0.91	0.00036453
sfc1	SPAC6F12.11c	0.78	0.0065304
par2	SPAC6F12.12	0.95	0.0031403
SPAC6F6.19	SPAC6F6.19	0.76	0.0176301
trx1	SPAC7D4.07c	1.33	2.1e-07
SPAC806.04c	SPAC806.04c	0.92	0.00047128
ppk15	SPAC823.03	1.17	4.634e-05
SPAC823.09c	SPAC823.09c	0.76	0.0114649
atg1802	SPAC823.16c	0.79	0.0138523
glo2	SPAC824.07	0.88	0.00062599
spc34	SPAC8C9.17c	0.79	0.00462093
atd2	SPAC922.07c	0.73	0.0182222
SPAC977.14c	SPAC977.14c	1.11	0.00066244
SPAC9E9.04	SPAC9E9.04	0.7	0.00857401
SPAC9E9.15	SPAC9E9.15	0.93	0.00232929
SPACUNK4.10	SPACUNK4.10	0.87	0.00058155
mgr3	SPAP27G11.02	0.7	0.0119011
SPAPB18E9.04c	SPAPB18E9.04c	1.05	0.00226667
SPAPB1A10.05	SPAPB1A10.05	1	0.00821683
SPAPB1A10.13	SPAPB1A10.13	0.82	0.0107415
mfc1	SPAPB1A11.01	1.46	0.0159706
SPAPB24D3.03	SPAPB24D3.03	1.13	0.00031105
SPAPB24D3.06c	SPAPB24D3.06c	0.99	0.00040904
gpi12	SPAPB2B4.01c	0.87	0.00988158
SPAPJ695.02	SPAPJ695.02	1.29	0.0234325
srx1	SPBC106.02c	1.55	1.713e-05
gid9	SPBC106.13	1.08	0.00059478
rav1	SPBC1105.10	0.88	0.010119
ppk19	SPBC119.07	0.8	0.0109508
tfg2	SPBC1198.13c	0.74	0.0135797
ivn1	SPBC11B10.07c	0.76	0.0178374
SPBC11C11.01	SPBC11C11.01	0.75	0.0177517
pof13	SPBC1271.01c	1.43	1.166e-05
SPBC1271.08c	SPBC1271.08c	1.46	0.00111907
SPBC12C2.04	SPBC12C2.04	0.76	0.00489269
glo1	SPBC12C2.12c	1.02	9.158e-05
SPBC1348.12	SPBC1348.12	1.79	6.991e-05
rbd1	SPBC13E7.11	1.24	1.764e-05
SPBC146.04	SPBC146.04	0.86	0.0305165
mug186	SPBC14F5.11c	0.76	0.00801869
SPBC1539.02	SPBC1539.02	0.77	0.0275929
klp9	SPBC15D4.01c	0.82	0.0163497
ght4	SPBC1683.08	1.27	7.77e-05
fhn1	SPBC1685.13	1.01	0.0404598
cip1	SPBC16A3.18	0.8	0.0155542
vps10	SPBC16C6.06	1.05	0.00028037
hsp104	SPBC16D10.08c	1.66	3.93e-06
php4	SPBC16E9.01c	0.81	0.0227991
lsd90	SPBC16E9.16c	3.74	0
SPBC16G5.16	SPBC16G5.16	0.71	0.0232057
SPBC16H5.12c	SPBC16H5.12c	0.7	0.00934147
png2	SPBC1709.11c	1.01	0.00020235
SPBC1709.16c	SPBC1709.16c	0.86	0.00575132
SPBC1711.11	SPBC1711.11	1.58	5.75e-05
SPBC1711.12	SPBC1711.12	0.78	0.0058123
msp1	SPBC1718.06	0.72	0.0100363
bcp1	SPBC1773.02c	1.17	0.00106499
fim1	SPBC1778.06c	0.82	0.00309522
nak1	SPBC17F3.02	0.7	0.0150462
SPBC18H10.05	SPBC18H10.05	0.72	0.0371183
meu22	SPBC19F8.06c	1.67	0.00257589
SPBC19G7.18c	SPBC19G7.18c	1.46	4e-08
byr2	SPBC1D7.05	1.06	0.00071276
SPBC20F10.07	SPBC20F10.07	0.91	0.00215143
rtc5	SPBC21.02	0.9	0.0107427
ubc8	SPBC211.07c	1.31	9.75e-06
csn1	SPBC215.03c	0.78	0.0101731
pdp2	SPBC215.07c	1.05	0.00085684
SPBC215.10	SPBC215.10	0.95	0.00045465
SPBC215.11c	SPBC215.11c	1.29	0.0373736
SPBC216.03	SPBC216.03	1.58	0
ath1	SPBC21B10.03c	0.91	0.00032839
SPBC21B10.08c	SPBC21B10.08c	0.72	0.00668222
ymr31	SPBC21B10.14	0.86	0.00773587
opi10	SPBC21H7.06c	1.88	5e-08
SPBC23G7.06c	SPBC23G7.06c	1.1	0.00018079
SPBC23G7.10c	SPBC23G7.10c	1.93	0.00254713
ctr6	SPBC23G7.16	1.1	4.297e-05
mam1	SPBC25B2.02c	0.74	0.021027
SPBC25B2.03	SPBC25B2.03	0.83	0.00581151
SPBC25B2.10	SPBC25B2.10	0.83	0.00477121
SPBC25H2.03	SPBC25H2.03	0.77	0.0174256
cyc3	SPBC26H8.12	0.77	0.0167558
sua1	SPBC27.08c	1.7	0
mmm1	SPBC27B12.01c	0.86	0.00807746
atf1	SPBC29B5.01	1.47	2.5e-07
SPBC2A9.03	SPBC2A9.03	0.77	0.0414917
SPBC2F12.05c	SPBC2F12.05c	0.93	0.0095903
mmf1	SPBC2G2.04c	1.24	7.539e-05
atg2	SPBC31E1.01c	1.25	0.00062401
SPBC31F10.02	SPBC31F10.02	0.89	0.0154147
css1	SPBC32F12.01c	0.71	0.0288728
tfb5	SPBC32F12.15	0.95	0.00189604
gem7	SPBC32F12.16	1.08	0.00143164
git5	SPBC32H8.07	0.92	0.00880208
coq7	SPBC337.15c	0.83	0.00479042
abc3	SPBC359.05	0.76	0.0255044
mug14	SPBC359.06	2.43	0
SPBC365.07c	SPBC365.07c	0.83	0.0148821
SPBC36B7.05c	SPBC36B7.05c	0.78	0.0123138
gcn2	SPBC36B7.09	0.76	0.0139309
isa2	SPBC3B9.17	0.7	0.00987584
SPBC3E7.04c	SPBC3E7.04c	0.81	0.01236
SPBC3H7.03c	SPBC3H7.03c	0.71	0.00870136
xdj1	SPBC405.04c	0.74	0.00784288
stn1	SPBC409.12c	0.82	0.0101453
SPBC409.18	SPBC409.18	0.71	0.0124022
tam7	SPBC409.23	0.84	0.015742
arg12	SPBC428.05c	0.83	0.00228067
vba2	SPBC460.03	1	0.004782
SPBC460.04c	SPBC460.04c	1.44	0.0194193
atg5	SPBC4B4.10c	0.75	0.0431315
2019-09-01	SPBC4C3.12	0.76	0.0137041
kin1	SPBC4F6.06	0.74	0.0252026
tam13	SPBC56F2.15	1.37	9.9e-07
iqw1	SPBC609.03	1.08	0.0002668
sds23	SPBC646.13	0.83	0.00241408
dot2	SPBC651.05c	0.97	0.00043669
mug168	SPBC660.09	0.74	0.0251429
SPBC660.16	SPBC660.16	1.2	1.269e-05
SPBC685.03	SPBC685.03	0.85	0.0296047
SPBC691.05c	SPBC691.05c	1.02	0.00060063
ppk30	SPBC6B1.02	0.7	0.0412634
atg7	SPBC6B1.05c	0.8	0.0110072
nbs1	SPBC6B1.09c	0.85	0.0107437
ubp15	SPBC713.02c	0.91	0.00110661
adl1	SPBC713.06	0.98	0.00276432
ppk31	SPBC725.06c	1.41	0.00792223
php2	SPBC725.11c	0.8	0.0235281
psf2	SPBC725.13c	0.75	0.0161638
SPBC776.05	SPBC776.05	0.76	0.0156734
sog2	SPBC887.09c	0.7	0.0232173
SPBC8D2.11	SPBC8D2.11	1.25	2.24e-06
SPBC8E4.03	SPBC8E4.03	1.01	0.00429835
SPBC8E4.04	SPBC8E4.04	1.66	2e-07
SPBC8E4.05c	SPBC8E4.05c	1.68	8.792e-05
idh2	SPBC902.05c	1.16	5.69e-06
nde1	SPBC947.15c	0.97	0.00027308
toc1	SPBP18G5.03	1	0.00033414
SPBP19A11.07c	SPBP19A11.07c	0.88	0.0118441
ell1	SPBP23A10.14c	0.88	0.00475962
car1	SPBP26C9.02c	1.93	1e-08
txc1	SPBP35G2.02	1.08	0.00030808
nup131	SPBP35G2.06c	0.83	0.0106211
pho1	SPBP4G3.02	1.09	0.00022454
SPBP4H10.10	SPBP4H10.10	1.42	0.00017172
SPBP4H10.12	SPBP4H10.12	1.59	1.301e-05
SPBP4H10.17c	SPBP4H10.17c	1.31	2.9e-06
set6	SPBP8B7.07c	0.8	0.00634161
atg8	SPBP8B7.24c	1.38	8.8e-07
stc1	SPBP8B7.28c	0.87	0.0112537
SPBPB21E7.02c	SPBPB21E7.02c	1.67	0.00887962
aes1	SPBPB21E7.07	1.88	3.28e-06
SPBPB21E7.08	SPBPB21E7.08	1.68	1.63e-06
SPBPB21E7.09	SPBPB21E7.09	1.06	0.0190689
SPBPB21E7.10	SPBPB21E7.10	1.99	0.00186524
SPBPB2B2.01	SPBPB2B2.01	1.08	0.0120793
SPBPB2B2.06c	SPBPB2B2.06c	2.8	0
gal1	SPBPB2B2.13	1.15	0.0018548
SPBPB7E8.02	SPBPB7E8.02	0.92	0.00856789
fxn1	SPCC1183.03c	0.88	0.00256168
gid1	SPCC1259.12c	0.74	0.0111705
pku70	SPCC126.02c	0.96	0.00278291
fyu1	SPCC1322.04	1.23	1.729e-05
SPCC1322.09	SPCC1322.09	0.71	0.0116959
SPCC1322.10	SPCC1322.10	0.77	0.00451933
ctr4	SPCC1393.10	1.07	0.0013036
SPCC1450.09c	SPCC1450.09c	1.07	0.00559204
SPCC1450.12	SPCC1450.12	0.85	0.00199287
SPCC1450.13c	SPCC1450.13c	1.71	0
SPCC1620.06c	SPCC162.06c	0.83	0.00286638
ent1	SPCC1620.09c	0.83	0.00499732
tfa2	SPCC1672.08c	0.84	0.00180122
ctl1	SPCC1682.11c	0.78	0.0150118
SPCC16A11.15c	SPCC16A11.15c	1.35	1.895e-05
SPCC16C4.10	SPCC16C4.10	0.72	0.00763747
SPCC1739.08c	SPCC1739.08c	2.13	3.835e-05
mug33	SPCC1739.10	0.73	0.00707285
SPCC18.17c	SPCC18.17c	0.73	0.0123752
fum1	SPCC18.18c	0.86	0.00094047
SPCC1827.03c	SPCC1827.03c	1.23	1e-05
cds1	SPCC18B5.11c	0.74	0.007484
SPCC23B6.01c	SPCC23B6.01c	0.72	0.00788283
SPCC285.04	SPCC285.04	1.32	9.24e-06
mdh1	SPCC306.08c	1.56	3.35e-06
SPCC320.05	SPCC320.05	1.44	0.00014855
rhp16	SPCC330.01c	0.87	0.00562439
mug135	SPCC330.04c	1.07	0.00467251
pmp20	SPCC330.06c	1.61	0
ctp1	SPCC338.08	0.85	0.00321999
bis1	SPCC364.02c	1.14	0.00027455
tum1	SPCC4B3.01	1.18	0.00020226
SPCC4G3.12c	SPCC4G3.12c	1.18	0.0009196
ght1	SPCC548.07c	1.28	0.024673
arp6	SPCC550.12	0.7	0.0391266
SPCC569.03	SPCC569.03	0.79	0.0167713
SPCC569.05c	SPCC569.05c	0.85	0.0107994
SPCC584.01c	SPCC584.01c	0.82	0.0242495
str2	SPCC61.01c	0.73	0.0235912
SPCC61.03	SPCC61.03	1.15	0.00038421
SPCC622.06c	SPCC622.06c	1.04	0.00086839
sec5	SPCC622.10c	0.74	0.0106891
SPCC622.11	SPCC622.11	1.08	0.00210968
tap42	SPCC63.05	1.41	0.00455709
atg1	SPCC63.08c	0.9	0.00220421
tmp1	SPCC70.07c	0.76	0.00764401
SPCC70.08c	SPCC70.08c	3.07	0
zwf2	SPCC794.01c	2.62	0
SPCC794.04c	SPCC794.04c	2.9	0
efr3	SPCC794.08	0.86	0.00249638
wtf24	SPCC830.02	1.23	0.0208379
SPCC895.08c	SPCC895.08c	1.37	0.00014533
SPCC965.09	SPCC965.09	0.95	0.00091199
are2	SPCP1E11.05c	1.11	0.00024318
SPCPB16A4.07	SPCPB16A4.07	2.46	0
xks1	SPCPJ732.02c	1.15	0.00023092
