# Supplementary material for: Translational control of gene expression by eIF2 modulates proteostasis and extends lifespan
Source: Aging (Albany NY). 2021 Apr 26;13(8):10989–1009. doi: 10.18632/aging.203018 (PMC8109070; doi:10.18632/aging.203018)
Supplement: Supplementary Table 8 [file aging-13-203018-s009.xlsx]

## Sheet: Supplementary Table 8
Supplementary Table 8. Translationally up-regulated genes whose TE wild type / TE S52A > 1.5.
upregulated genes exclusive of eIF2α.S52A
Gene.name	ID	logFoldChange	pvalue
sir1	SPAC10F6.01c	1.01	0.0205691
ubc6	SPAC10F6.05c	0.95	0.0112546
mcp60	SPAC12G12.04	0.87	0.0336631
gld1	SPAC13F5.03c	1.33	0.00716598
mde6	SPAC15A10.10	1.02	0.0309331
SPAC1786.02	SPAC1786.02	0.84	0.0325319
wis2	SPAC1B3.03c	1.39	0.00308697
bip1	SPAC22A12.15c	0.79	0.0230484
gmh3	SPAC22E12.06c	0.75	0.0399165
pvg5	SPAC22F8.02c	1	0.0453631
hhp2	SPAC23C4.12	1.03	0.0111229
SPAC27D7.08c	SPAC27D7.08c	0.82	0.0326202
imt1	SPAC2F3.01	0.86	0.0194516
saf2	SPAC2F3.14c	0.97	0.0151794
SPAC3A12.06c	SPAC3A12.06c	0.9	0.0143523
pcc1	SPAC4H3.13	0.89	0.0145536
rst2	SPAC6F12.02	0.75	0.0377317
vps1	SPAC767.01c	0.7	0.040071
tim14	SPAC824.06	0.77	0.0305476
cgs1	SPAC8C9.03	1	0.0408266
hsp90	SPAC926.04c	0.93	0.0424904
SPAC977.05c	SPAC977.05c	3.86	0
SPAC9E9.05	SPAC9E9.05	0.89	0.0486865
SPAC9G1.07	SPAC9G1.07	0.71	0.048548
mid2	SPAPYUG7.03c	0.76	0.0359021
plg7	SPBC106.11c	0.78	0.040566
cbp1	SPBC1105.04c	1.41	9.263e-05
sco1	SPBC119.06	0.72	0.049631
SPBC1271.03c	SPBC1271.03c	0.78	0.0323177
ppr8	SPBC1289.06c	0.98	0.00933002
cdm1	SPBC12D12.02c	1.24	0.00975862
frp1	SPBC1683.09c	1.4	0.00064071
zrt1	SPBC16D10.06	0.87	0.0112432
rid1	SPBC1709.12	0.87	0.0163996
aha1	SPBC1711.08	0.9	0.0412441
SPBC1778.03c	SPBC1778.03c	0.75	0.0386463
bqt4	SPBC19C7.10	0.87	0.0302312
omh1	SPBC19C7.12c	1.03	0.0118871
SPBC23G7.14	SPBC23G7.14	1.02	0.0223628
pof2	SPBC25B2.11	0.86	0.0252571
ccc2	SPBC29A3.01	0.7	0.0428964
SPBC337.02c	SPBC337.02c	0.74	0.0486501
uge1	SPBC365.14c	0.77	0.0229665
SPBC36B7.02	SPBC36B7.02	1.18	0.00191377
fes1	SPBC3B9.01	1.06	0.0151695
slx8	SPBC3D6.11c	0.78	0.0319672
far10	SPBC3H7.13	0.81	0.0239566
erg1	SPBC713.12	1.03	0.00629959
SPBC83.17	SPBC83.17	1.31	0.00214191
cta3	SPBC839.06	1.4	0.00698254
SPBC8D2.12c	SPBC8D2.12c	1.06	0.00564006
SPBP4H10.07	SPBP4H10.07	0.78	0.0456855
SPBPB2B2.15	SPBPB2B2.15	1.71	0.00164146
zip2	SPCC126.09	0.87	0.0467867
ssa2	SPCC1739.13	1.01	0.0352744
adg3	SPCC18.01c	0.9	0.0137518
wtf19	SPCC1906.03	0.91	0.0486012
SPCC191.10	SPCC191.10	1.41	0.00912351
wtf18	SPCC285.07c	1.2	0.0216291
cap1	SPCC306.09c	0.82	0.0257445
SPCC320.06	SPCC320.06	0.79	0.0439303
coa4	SPCC550.01c	0.75	0.0418092
bqt3	SPCC594.07c	0.81	0.0251926
sti1	SPCC645.14c	1.16	0.0146777
pmd1	SPCC663.03	1	0.00469833
SPCC70.03c	SPCC70.03c	0.88	0.0114762
SPCC70.10	SPCC70.10	1.3	0.00171716
ssp2	SPCC74.03c	0.73	0.0456916
