# Supplementary material for: Translational control of gene expression by eIF2 modulates proteostasis and extends lifespan
Source: Aging (Albany NY). 2021 Apr 26;13(8):10989–1009. doi: 10.18632/aging.203018 (PMC8109070; doi:10.18632/aging.203018)
Supplement: Supplementary Table 9 [file aging-13-203018-s010.xlsx]

## Sheet: Supplementary Table 9
Supplementary Table 9. KEGGS analysis of up-regulated genes in wild type cells.
		WT		eIF2α.S52A
Gene.name	ID	logFoldChange	pvalue	logFoldChange2	pvalue3
hsp16	SPBC3E7.02c	6.41	0	1.15	0.0212037
eno102	SPBPB21E7.01c	5.44	0	3.17	0
SPAC4F10.17	SPAC4F10.17	5.25	0	2.51	2.43e-06
SPBPB10D8.02c	SPBPB10D8.02c	5.13	0	2.81	0
hsp3101	SPCC757.03c	4.66	0	1.15	0.0240783
mel1	SPAC869.07c	4.44	0	2.02	0.00015202
SPAC513.02	SPAC513.02	4.43	0	1.17	0.0233437
SPAC869.06c	SPAC869.06c	4.35	0	1.58	0.00344803
SPAC23H3.15c	SPAC23H3.15c	4.31	0	0.99	0.04856
mug147	SPBC56F2.06	4.28	0	2.53	1.78e-06
inv1	SPCC191.11	4.25	0	1.55	0.00332359
SPAC4H3.03c	SPAC4H3.03c	4.21	0	2.69	1.2e-07
osr2	SPCC965.06	4.19	0	2.33	3.5e-07
cum1	SPAC22G7.11c	4.18	0	1.13	0.0318099
SPBPB2B2.08	SPBPB2B2.08	4.16	0	1.68	0.00143029
prl65	SPAC19A8.16	4.13	0	2.19	1.291e-05
hsp3105	SPAC1F7.06	4.1	0	2.35	1.02e-05
SPBPB10D8.01	SPBPB10D8.01	4.05	0	1.95	1.222e-05
SPBC24C6.09c	SPBC24C6.09c	4.01	0	2.52	1.02e-06
SPCC1393.12	SPCC1393.12	3.69	0	2.03	5.28e-06
SPBC21C3.19	SPBC21C3.19	3.63	0	1.2	0.0203825
SPBPB21E7.11	SPBPB21E7.11	3.6	0	1.54	0.00347547
SPBPB2B2.07c	SPBPB2B2.07c	3.48	2e-08	1.41	0.00855381
met17	SPBC428.11	3.41	0	1.99	1.5e-07
SPAC977.02	SPAC977.02	3.4	0	1.63	0.00033772
SPAC869.09	SPAC869.09	3.3	0	2.16	4.575e-05
SPAC15E1.02c	SPAC15E1.02c	3.25	0	2.13	1.31e-06
rds1	SPAC343.12	3.17	0	1.58	0.0001649
SPAC26F1.11	SPAC26F1.11	3.15	0	1.97	0.00013314
SPAPB1A11.02	SPAPB1A11.02	3.03	5.3e-07	1.72	0.0014441
SPCPB1C11.03	SPCPB1C11.03	2.97	0	1.73	3.835e-05
cao2	SPBC1289.16c	2.96	0	1.1	0.0154105
SPAC139.05	SPAC139.05	2.78	0	1.69	0.00035234
hmt2	SPBC2G5.06c	2.75	0	1.77	3.9e-06
SPAC11D3.09	SPAC11D3.09	2.72	0	1.33	0.00481073
gdh2	SPCC132.04c	2.64	0	1.19	0.00121766
SPAC688.03c	SPAC688.03c	2.61	0	1.33	0.00085593
hac1	SPBC725.04	2.61	0	1.35	0.0011907
SPAC29A4.17c	SPAC29A4.17c	2.6	0	1.54	0.00055048
SPBC1773.03c	SPBC1773.03c	2.59	0	1.07	0.00912106
SPCC330.03c	SPCC330.03c	2.58	0	1.47	0.00030605
ish1	SPBC365.12c	2.57	0	1.11	0.0332271
zym1	SPAC22H10.13	2.49	0	1.54	0.00055578
gst2	SPCC965.07c	2.47	0	1.44	0.00031252
hpz2	SPAC13F5.07c	2.41	1.37e-06	1.22	0.0238685
mug35	SPAC22H12.01c	2.4	0	1.57	0.00046338
grx1	SPAC4F10.20	2.38	0	1.55	0.00066909
SPAPJ691.02	SPAPJ691.02	2.37	0	1.31	0.0105181
zwf1	SPAC3A12.18	2.35	0	1.29	0.0007461
SPAPB24D3.08c	SPAPB24D3.08c	2.34	0	1.26	0.00097055
SPAC27D7.09c	SPAC27D7.09c	2.33	0	1.18	0.0258552
SPCC1281.04	SPCC1281.04	2.32	1.68e-06	1.2	0.0224629
SPBPB2B2.05	SPBPB2B2.05	2.31	0	1.38	0.00256502
mug108	SPAC29A4.12c	2.26	8.21e-06	1.49	0.00325114
pas1	SPAC19E9.03	2.25	0	1.12	0.00318904
SPBC3H7.08c	SPBC3H7.08c	2.24	8.5e-07	1.49	0.00256688
mug191	SPAC3C7.05c	2.22	0	1.3	0.00193792
SPBC1271.07c	SPBC1271.07c	2.22	0	1.46	6.389e-05
SPAC869.02c	SPAC869.02c	2.21	1e-08	1.38	0.0003735
gpx1	SPBC32F12.03c	2.2	0	1.3	0.00179592
mug182	SPAC15A10.05c	2.12	0	1.11	0.0130864
pgc1	SPAC4D7.02c	2.1	0	1.11	0.0067087
dhd1	SPAC513.06c	2.07	0	1.1	0.00844143
pcm2	SPAC869.08	2.06	0.00028763	1.11	0.0371135
pbi2	SPCC338.12	2.06	0	1.01	0.0234925
rsv2	SPBC1105.14	2.05	9e-08	1.14	0.0137364
SPCC736.13	SPCC736.13	2.04	0	1.19	0.00103416
plr1	SPAC9E9.11	2.03	0	0.97	0.0235542
atg17	SPAC10F6.11c	2.01	0	0.87	0.0222198
dak2	SPAC977.16c	2	0	0.89	0.027897
SPBC106.03	SPBC106.03	1.99	0	1.16	0.00310172
aif1	SPAC26F1.14c	1.97	0	1.08	0.0152689
SPAC4H3.04c	SPAC4H3.04c	1.95	0	1.15	0.00667143
SPBC1289.14	SPBC1289.14	1.92	0.00034554	1.15	0.0292468
SPBC1685.05	SPBC1685.05	1.87	0	1.01	0.0125353
pof14	SPAC13D6.01	1.84	2e-08	1.05	0.00999346
SPBC16A3.02c	SPBC16A3.02c	1.84	0	1.01	0.0172119
SPBC725.03	SPBC725.03	1.82	2e-08	0.96	0.0447637
SPBC2A9.02	SPBC2A9.02	1.76	0	0.94	0.0148911
mag1	SPAPB24D3.04c	1.74	4.6e-07	1.1	0.0180795
alo1	SPAPB1A10.12c	1.69	0	1.01	0.00436326
isp6	SPAC4A8.04	1.68	0	0.9	0.0304456
SPAPB1E7.08c	SPAPB1E7.08c	1.67	1e-08	0.89	0.0162933
atm1	SPAC15A10.01	1.65	0	0.94	0.0175516
SPAC6B12.04c	SPAC6B12.04c	1.62	4.1e-07	0.97	0.0208718
ssa1	SPAC13G7.02c	1.61	0.0118095	1	0.042081
fsv1	SPAC6F12.03c	1.51	1.1e-07	0.77	0.0392598
SPCC622.15c	SPCC622.15c	1.48	1.353e-05	0.9	0.0406001
SPAC16A10.01	SPAC16A10.01	1.43	8.772e-05	0.92	0.0356511
nas6	SPAC6C3.08	1.4	2.34e-06	0.86	0.0431907
SPAC20G4.05c	SPAC20G4.05c	1.39	1.78e-06	0.89	0.0208662
rnf10	SPBP8B7.23	1.32	1.68e-06	0.74	0.0424828
spd2	SPAC3F10.19	1.31	1e-06	0.75	0.0401004
tam12	SPBC1105.19	1.31	7.113e-05	0.86	0.041911
SPCC70.02c	SPCC70.02c	1.25	2.6e-06	0.79	0.030553
spd1	SPAC29B12.03	1.05	4.473e-05	0.7	0.040783
