# Supplementary material for: Translational control of gene expression by eIF2 modulates proteostasis and extends lifespan
Source: Aging (Albany NY). 2021 Apr 26;13(8):10989–1009. doi: 10.18632/aging.203018 (PMC8109070; doi:10.18632/aging.203018)
Supplement: Supplementary Table 10 [file aging-13-203018-s011.xlsx]

## Sheet: Supplementary Table 10
Supplementary Table 10. KEGGS analysis of up-regulated genes in wild type cells.
Category	Term	Count	%	PValue	Genes	List Total	Pop Hits	Pop Total	Fold Enrichment	Benjamini	FDR
KEGG_PATHWAY	spo01200:Carbon metabolism	23	3.59375	4.43278e-07	SPCC16C4.10; SPCC364.07; SPAC24C9.06c; SPBC3H7.03c; SPAC10F6.13c; ctt1; cit1; cys11; dld1; dak1; dak2; eno102; fbp1; fum1; SPAC3C7.13c; SPCC794.01c; zwf1; gpd3; SPBC428.11; jdh2; jdh1; SPCC306.08c; SPBC660.16	167	78	1842	3.25242	3.72346e-05	0.000475806
KEGG_PATHWAY	spo04140:Regulation of autophagy	9	1.40625	4.83637e-07	atg4; atg1; atg5; atg8; atg13; atg6; pik3; ppk19; atg7	167	11	1842	9.0245	2.03126e-05	0.000519127
KEGG_PATHWAY	spo01100:Metabolic pathways	76	11.875	3.43688e-05	ayr1; uga1; SPCC16C4.10; SPCC364.07; SPBPB21E7.09; gdh2; gal10; SPCC1322.04; SPAC24C9.06c; SPAC11D3.09; SPAPB24D3.03; SPBC8E4.03; SPAC922.07c; SPAC1F7.09c; ntp1; tps1; SPAC22F8.05; SPACUNK4.16c; agl1; SPBC3H7.03c; SPAC6B12.04c; car1; arg12; SPAC10F6.13c; atg15; inv1; SPBC119.03; SPBPB21E7.04c; cit1; cao2; SPAC23A1.14c; cys11; dld1; dak1; dak2; eno102; etr1; fbp1; fum1; SPBC8E4.05c; gal1; SPAC26F1…	167	569	1842	1.47324	0.000961881	0.0368848
KEGG_PATHWAY	spo01130:Biosynthesis of antibiotics	30	4.6875	0.000534438	SPCC16C4.10; SPCC364.07; SPAC13C5.05c; gal10; SPCC1322.04; SPAC24C9.06c; SPBC3H7.03c; car1; arg12; SPAC10F6.13c; ctt1; cit1; SPAC23A1.14c; cys11; dld1; eno102; fbp1; fum1; SPAC26F1.07; SPAC3C7.13c; SPCC794.01c; zwf1; gdp3; SPBC428.11; cys2; idh1; idh2; SPCC306.08c; SPBC660.16; sua1;	167	175	1842	1.89085	0.0111634	0.572168
KEGG_PATHWAY	spo00920:Sulfur metabolism	7	1.09375	0.000797704	SPAC23A1.14c; cys11; SPBC428.11; sua1; hmt2, SPCC584.01c; tum1	167	14	1842	5.51497	0.0133173	0.852927
KEGG_PATHWAY	spo01110:Biosynthesis of secondary metabolites	37	5.78125	0.000930517	SPCC16C4.10; SPBPB21E7.09; gal10; SPAC24C9.06c; SPAC922.07c; SPBC3H7.03c; car1; arg12; SPAC10F6.13c; ctt1; cit1; cao2; SPAC23A1.14c; cys11; dld1; eno102; fbp1; fum1; SPAC26F1.07; SPAC3C7.13c; SPCC794.01c; zwf1; gpd3; gut2; SPBC428.11; idh1; idh2; ned1; SPCC306.08c; SPBC409.18; psd2; SPBC660.16; SPAC3G9.11c; SPCC1450.13c; cog7; obr1; SPCC1739.06c	167	242	1842	1.6864	0.0129487	0.994291
KEGG_PATHWAY	spo00561:Glycerolipid metabolism	7	1.09375	0.0018246	mel1; atg15; dak1; dak2; SPAC26F1.07; ned1; SPBC409.18	167	16	1842	4.8256	0.0216768	1.9412
KEGG_PATHWAY	spo00020:Citrate cycle (TCA cycle)	8	1.25	0.00226285	SPAC24C9.06c; SPBC3H7.03c; cit1; dld1; fum1; idh1; idh2; SPCC306.08c	167	22	1842	4.01089	0.0235062	2.40233
KEGG_PATHWAY	spo00350:Tyrosine metabolism	7	1.09375	0.00261204	SPAC922.07c; SPAC10F6.13c; SPBC119.03; SPBPB21E7.04c; cao2; SPAC1002.12c; SPAC139.05	167	17	1842	4.54174	0.0241154	2.76835
KEGG_PATHWAY	spo00564:Glycerophospholipid metabolism	10	1.5625	0.00428366	ayr1; SPAC6G10.03c; gut2; SPAC4D7.02c; ned1; plb1; SPBC409.18; psd2; SPAC1A6.03c; SPCC1450.09c	167	37	1842	2.98106	0.0354176	4.50335
KEGG_PATHWAY	spo00030:Pentose phosphate pathway	7	1.09375	0.00844264	SPCC16C4.10; fpb1; SPAC3C7.13c; SPCC794.01c; zwf1; SPBC660.16; SPBC24C6.09c	167	21	1842	3.67665	0.0626934	8.69885
KEGG_PATHWAY	spo00500:Starch and sucrose metabolism	9	1.40625	0.0104022	SPCC1322.04; ntp1; tps1; SPAC22F8.05; SPACUNK4.16c; agl1; inv1; bgl2; tpp1	167	35	1842	2.83627	0.0705818	10.617
KEGG_PATHWAY	spo00040:Pentose and glucuronate interconversions	4	0.625	0.0117242	SPCC1322.04; SPAC26F1.07; tms1; SPCPJ732.02c	167	6	1842	7.35329	0.073373	11.8905
KEGG_PATHWAY	spo00480:Glutathione metabolism	7	1.09375	0.0134954	SPAC3C7.13c; SPCC794.01c; zwf1; gst2; gst3; gpx1; SPBC660.16	167	23	1842	3.35694	0.0782894	13.5708
KEGG_PATHWAY	spo00052:Galactose metabolism	6	0.9375	0.0181942	gal10; SPCC1322.04; mel1; agl1; inv1; gal1	167	18	1842	3.67665	0.0977158	17.8885
KEGG_PATHWAY	spo00250:Alanine, aspartate and glutamate metabolism	7	1.09375	0.0245416	uga1; SPBPB21E7.09; gdh2; arg12; SPAC10F6.13c; SPAC1002.12c; SPAC139.05	167	26	1842	2.9696	0.1223	23.4106
KEGG_PATHWAY	spo00010:Glycolysis / Gluconeogenesis	8	1.25	0.0327874	gal10; SPAC922.07c; dld1; eno102; fpb1; SPAC26F1.07; gpd3; SPAC3G9.11c	167	35	1842	2.52113	0.151872	30.081
KEGG_PATHWAY	spo00630:Glyoxylate and dicarboxylate metabolism	5	0.78125	0.0394395	SPAC24C9.06c; ctt1; cit1; dld1; SPCC306.08c	167	15	1842	3.67665	0.171202	35.0734
KEGG_PATHWAY	spo00620:Pyruvate metabolism	6	0.9375	0.0416816	dld1; fum1; glo1; SPAC186.02c; SPAC824.07; SPCC306.08c	167	22	1842	3.00817	0.171574	36.6817
KEGG_PATHWAY	spo00270:Cysteine and methionine metabolism	7	1.09375	0.0468954	SPAC10F6.13c; SPAC23A1.14c; cys11; SPBC428.11; cys2; SPCC306.08c; tum1	167	30	1842	2.57365	0.182683	40.283
KEGG_PATHWAY	spo00680:Methane metabolism	5	0.78125	0.0597247	SPCC364.07; dak1; dak2; eno102; fbp1	167	17	1842	3.2441	0.218336	48.3675
