# Supplementary material for: Translational control of gene expression by eIF2 modulates proteostasis and extends lifespan
Source: Aging (Albany NY). 2021 Apr 26;13(8):10989–1009. doi: 10.18632/aging.203018 (PMC8109070; doi:10.18632/aging.203018)
Supplement: Supplementary Table 11 [file aging-13-203018-s012.xlsx]

## Sheet: Supplementary Table 11
Supplementary Table 11. KEGGS analysis of up-regulated genes in eIF2α.S52A cells.
Category	Term	Count	%	PValue	Genes	List Total	Pop Hits	Pop Total	Fold Enrichment	Benjamini	FDR
KEGG_PATHWAY	spo00500:Starch and sucrose metabolism	8	2.31214	0.000876063	ntp1; tps1; SPAC22F8.05; SPACUNK4.16c; agl1; inv1; bgl2; tpp1	87	35	1842	4.83941	0.0586825	0.900299
KEGG_PATHWAY	spo01100:Metabolic pathways	41	11.8497	0.00133032	plg7; SPCC364.07; cdm1; gdh2; uge1; gal10; SPAC11D3.09; ntp1; tps1; SPAC22F8.05; SPACUNK4.16c; agl1; SPAC6B12.04c; inv1; SPBC119.03; SPBPB21E7.04c; cao2; SPAC23A1.14c; cys11; dak1; dak2; eno102; etr1; fbp1; SPAC26F1.07; zwf1; gpd3; tms1; SPBC428.11; cys2; SPBC24C6.09c; gwt1; SPCC70.03c; SPCC1281.04; plr1; erg1; SPAC139.05; sir1; tpp1; SPCC1739.06c	87	569	1842	1.5256	0.0448879	1.36424
KEGG_PATHWAY	spo01200:Carbon metabolism	11	3.17919	0.00267085	SPCC364.07; ctt1; cys11; dak1; dak2; eno102; fbp1; SPAC3C7.13c; zwf1; gdp3; SPBC428.11	87	78	1842	2.98585	0.059658	2.72192
KEGG_PATHWAY	spo00920:Sulfur metabolism	5	1.44509	0.00309705	SPAC23A1.14c; cys11; SPBC428.11; hmt2; sir1	87	14	1842	7.56158	0.0521007	3.15002
KEGG_PATHWAY	spo01130:Biosynthesis of antibiotics	17	4.91329	0.00550614	plg7; SPCC364.07; SPAC13C5.05c; gal10; ctt1; SPAC23A1.14c; cys11; eno102; fbp1; SPAC26F1.07; SPAC3C7.13c; zwf1; gpd3; SPBC428.11; cys2; SPCC70.03c; erg1	87	175	1842	2.05675	0.0733642	5.53804
KEGG_PATHWAY	spo00680:Methane metabolism	5	1.44509	0.00661243	SPCC364.07; dak1; dak2; eno102; fbp1	87	17	1842	6.22718	0.0734576	6.61674
KEGG_PATHWAY	spo00052:Galactose metabolism	5	1.44509	0.00820295	uge1; gal10; mel1; agl1; inv1	87	18	1842	5.88123	0.0779825	8.14809
KEGG_PATHWAY	spo04141:Protein processing in endoplasmic reticulum	9	2.60116	0.0181418	bip1; hsp90; hri1; hsp16; SPCC338.06c; ssa1; ssa2; ubc6; otu1	87	73	1842	2.6103	0.146073	17.2145
KEGG_PATHWAY	spo00480:Glutathione metabolism	5	1.44509	0.0198645	SPAC3C7.13c; zwf1; gst2; gst3; gpx1	87	23	1842	4.6027	0.14258	18.7011
KEGG_PATHWAY	spo00564:Glycerophospholipid metabolism	6	1.7341	0.0264348	SPAC6G10.03c; gut2; SPAC4D7.02c; plb1; SPAC1786.02; SPAC1A6.03c	87	37	1842	3.43336	0.168775	24.1522
KEGG_PATHWAY	spo00561:Glycerolipid metabolism	4	1.15607	0.035413	mel1; dak1; dak2; SPAC26F1.07	87	16	1842	5.2931	0.202413	31.0675
KEGG_PATHWAY	spo00350:Tyrosine metabolism	4	1.15607	0.0415846	SPBC119.03; SPBPB21E7.04c; cao2; SPAC139.05	87	17	1842	4.98174	0.216689	35.4851
KEGG_PATHWAY	spo01110:Biosynthesis of secondary metabolites	18	5.20231	0.0499067	plg7; gal10; ctt1; cao2; SPAC23A1.14c; cys11; eno102; fbp1; SPAC26F1.07; SPAC3C7.13c; zwf1; gpd3; gut2; SPBC428.11; SPCC70.03c; erg1; obr1; SPCC1739.06c	87	242	1842	1.57481	0.237938	41.0373
KEGG_PATHWAY	spo00030:Pentose phosphate pathway	4	1.15607	0.0711881	fbp1; SPAC3C7.13c; zwf1; SPBC24C6.09c	87	21	1842	4.03284	0.305088	53.3279
KEGG_PATHWAY	spo00010:Glycolysis / Gluconeogenesis	5	1.44509	0.0770116	gal10; eno102; fbp1; SPAC26F1.07; gpd3	87	35	1842	3.02463	0.308324	56.2607
KEGG_PATHWAY	spo00520:Amino sugar and nucleotide sugar metabolism	4	1.15607	0.0887254	SPAC13C5.05c; uge1; gal10; gna1	87	23	1842	3.68216	0.330135	61.6616
